# Supplementary material for: Substitutions in woolly mammoth hemoglobin confer biochemical properties adaptive for cold tolerance
Source: Springer Nature journal article supplement (doi:10.1038/ng.574), 2010-05-02
Supplement: 41588_2010_BFng574_MOESM2_ESM.pdf [file 41588_2010_BFng574_MOESM2_ESM.pdf]

## **Supplementary Information**

### **Substitutions in woolly mammoth hemoglobin confer biochemical properties adaptive for cold tolerance**

Kevin L. Campbell, Jason E.E. Roberts, Laura N. Watson, Jörg Stetefeld, Angela M. Sloan, Anthony V. Signore, Jesse W. Howatt, Jeremy R.H. Tame, Nadin Rohland, Tong-Jian Shen, Jeremy J. Austin, Michael Hofreiter, Chien Ho, Roy E. Weber & Alan Cooper

#### **Supplementary materials include:**

Supplementary Figures S1–S12

Supplementary Tables S1–S4

Supplementary Note

## SUPPLEMENTARY NOTE

### Characterization of Asian/African elephant $\alpha$ -like and $\beta$ -like globin genes

The  $\alpha$ - and  $\beta$ -globin gene families of eutherian mammals have undergone numerous (and in many cases independent) tandem and *en bloc* duplications, interparalog gene conversions, silencing and deletion events since their divergence from metatherians<sup>1,2</sup>. Unfortunately, inconsistent use of the original Greek alphabet nomenclature system adopted for the loci of these gene clusters fails to reflect their complex evolutionary history, thus making it difficult to not only distinguish paralogous from orthologous sequences among species, but also silenced from functional genes<sup>3</sup>. We thus adopted the three-letter nomenclature system of Aguileta *et al.*<sup>3</sup> to best reflect the evolutionary origin of genes amplified/sequenced in this study. Within each cluster, tandemly duplicated genes are designated with the symbol -T followed by a number that corresponds to their 5' to 3' linkage order, while pseudogenes are indicated by a lowercase "ps". We classified globin-like loci as transcriptionally silent if they possessed a premature stop codon or lacked any of the following important characteristics of functional globin genes<sup>4,5</sup>: a) a 3 exon/2 intron structure, b) transcriptional control motifs common to the 5' flanking region of  $\alpha$ - or  $\beta$ -globin cluster genes, c) an 'ATG' initiation codon, d) 5'/3' GT-AG splice junction signals flanking each intron, and e) an intact poly-A signal in the 3' transcribed flanking region.

Functional mammalian  $\alpha$ -like and  $\beta$ -like globin genes are composed of three coding regions (normally comprising 92, 205 and 126 bp, and 89, 223 and 126 bp, respectively) separated by two intervening sequences of variable length, and flanked by transcriptionally important upstream and downstream noncoding regions<sup>4,5</sup> (see also Supplementary Figs. 2 and 3). We amplified complete, orthologous  $\alpha$ -like and  $\beta$ -like globin gene regions from the DNA of Asian (1010 and 2119 bp, respectively) and African (2335 and 1744 bp, respectively) elephants. We then utilized working draft BAC sequences of the African elephant to determine the identity of these two adult-expressed genes. Scaffolds spanning the entire  $\alpha$ -globin cluster were downloaded from GenBank (GB AC158446.2, AC160597.2, AC175811.2) and dotmatcher (EMBOSS) software was used to visualize regions of high homology with the three exons of the transcribed African  $\alpha$ -like gene product we obtained. The dotplot representation identified six distinct  $\alpha$ -like globin loci within the GenBank *Loxodonta* contigs. BlastN (<http://www.ncbi.nlm.nih.gov/blast/Blast.cgi>) and percent identity plots against known paralogs/orthologs were used to characterize the six  $\alpha$ -like genes as follows: 5'–*HBZ-T1*, *HBZ-T2*, *HBK*, *HBA-T1ps*, *HBA-T2*, *HBQ*–3'. This result differs slightly from the phylogenetically deduced 5'–*HBZ-T1*, *HBZ-T2*, *HBA-T1ps*, *HBA-T2*, *HBQ*–3' cluster arrangement recently published by Hoffmann *et al.*<sup>2</sup>. Exon and mRNA sequences of the African elephant  $\alpha$ -like globin product we sequenced precisely matched the *Loxodonta HBA-T2* locus.

Two non-overlapping BAC sequences from GenBank (AC167954.3, jxy; AC169166.2, ktd) and the super\_3994 contig of the Broad Institute 2× elephant assembly loxAfr1 (May 2005;

<http://genome.ucsc.edu/>), were also downloaded and examined using the procedures and criteria outlined above. Dotplot comparisons of the *Loxodonta* GenBank contigs against the exon sequences of the transcribed African 'β-like' gene product we obtained revealed five β-like globin loci, while four globin genes were detected in the super\_3994 strand, which we attribute to a sequence gap in this later contig. BlastN, dotplot and MATGAT analyses were used to designate these genes as: 5'–*HBE*, *HBG*, *HBDps*, *HBB/D*, *HBBps*–3', which is identical to the phylogenetically deduced arrangement of Opazo *et al.*<sup>6</sup>. Exon and mRNA sequences of our African elephant β-like globin product precisely matched the *HBB/D* locus. Thus, the single adult-expressed hemoglobin component of elephantids is encoded by the *HBA-T2* (α-chain) and *HBB/D* (β/δ-chain) loci.

Supplementary Figure 1. Schematic of the redundant overlapping sequencing strategy employed in this study to obtain the complete coding sequence of the *HBA-T2* ( $\alpha$ ) and *HBB/D* ( $\beta/\delta$ ) globin genes of woolly mammoth specimen SP1349. The lengths of the three coding exons and intervening sequences for each gene are given. Red and green arrows denote the direction each PCR product was directly sequenced. Cloned regions are outlined, with the number of clones sequenced indicated below each box. The locations of the three mammoth-specific amino-acid substitutions are indicated by arrows.

### *HBA-T2*

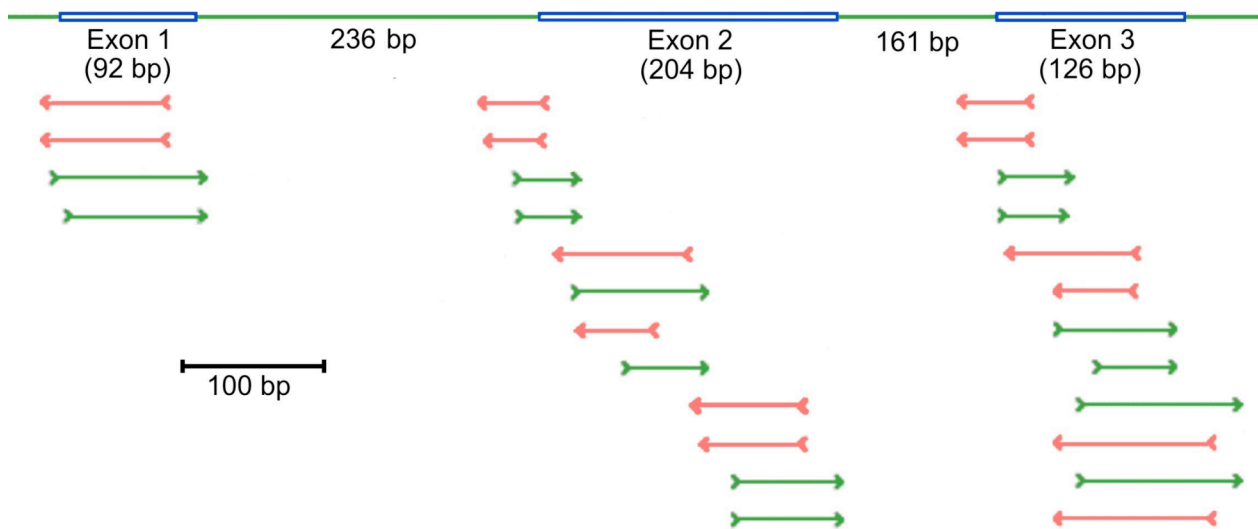

### *HBB/D*

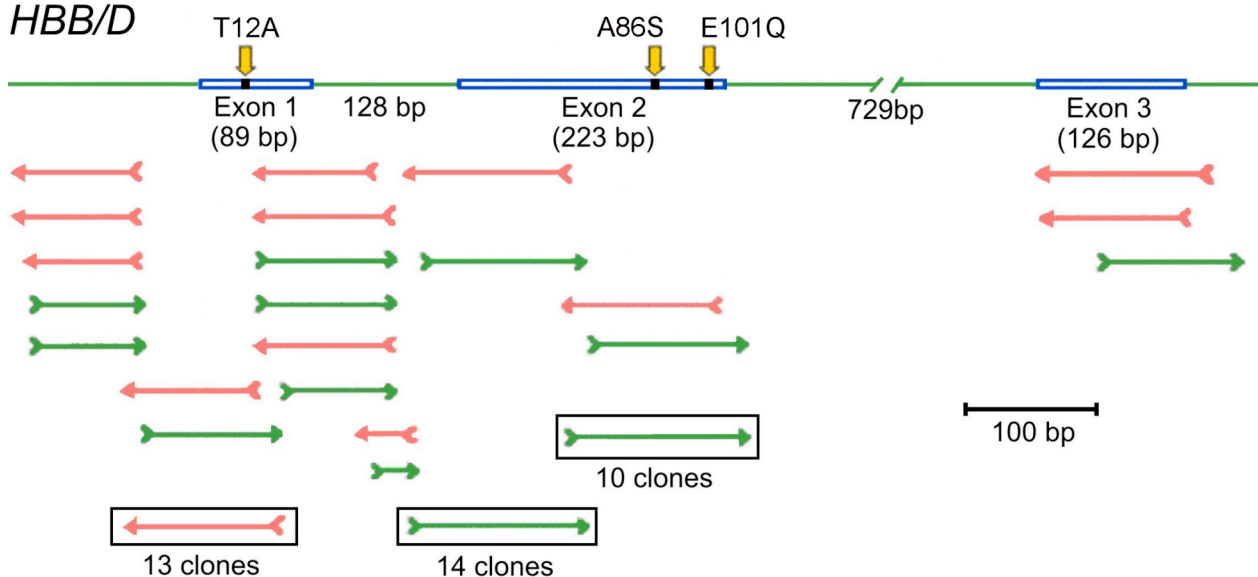

Supplementary Figure 2. DNA sequences of African elephant (*Loxodonta africana*), Asian elephant (*Elephas maximus*) and woolly mammoth (*Mammuthus primigenius*) HBA-T2 globin genes amplified in this study. Consensus sequences are presented for the two extant species while the 28 separate direct sequencing (F=forward, R=reverse) reactions from woolly mammoth specimen SP1349 are given. The transcribed mRNA sequence is identified by upper case letters, while intervening and nontranscribed flanking sequences are shown in lower case. Initiation (ATG) and stop (TGA) codons are underlined and bold. The 5' mRNA cap site ('CAP') and 3' poly-adenylation signal ('AATAAA') are underlined. Synonymous and nonsynonymous nucleotide changes are denoted by red and bold red characters, respectively. Within each coding block, the translated amino-acid sequences of the expressed woolly mammoth  $\alpha$ -globin chain are listed below the corresponding base triplets.

```

-40      -30      -20      -10      1
|. . . .|. . . .|. . . .|. . . .|. . . .|. . . .|. . . .|. . . .|. . . .|. . . .
Loxodonta africana  cACGCTTCTGATCTCCACACAGACTCAGAAACAACCCACCATGGTGCT
Elephas maximus   cACGCTTCTGATCTCCACACAGACTCAGAAACAACCCACCATGGTGCT
SP1349_Alpha2_R1.3_B05 -----AGAAACAACCCACCATGGTGCT
SP1349_Alpha2_R1.3_C01 -----AGAAACAACCCACCATGGTGCT
SP1349_Alpha2_F1.1_B01 -----AACCCACCATGGTGCT
SP1349_Alpha2_F1.1_A05 -----GGTGCT
'          CAP'

10      20      30      40      50
.|. . . .|. . . .|. . . .|. . . .|. . . .|. . . .|. . . .|. . . .|. . . .|. . . .|.
Loxodonta africana  GTCTGATAACGACAAGACCAACGTC AAGGCCACCTGGAGCAAGGTTGG
Elephas maximus   GTCTGATAAGGACAAGACCAACGTC AAGGCCACCTGGAGCAAGGTTGG
SP1349_Alpha2_R1.3_B05 GTCTGATAACGACAAGACCAACGTC AAGGCCACCTGGAGCAAGGTTGG
SP1349_Alpha2_R1.3_C01 GTCTGATAACGACAAGACCAACGTC AAGGCCACCTGGAGCAAGGTTGG
SP1349_Alpha2_F1.1_B01 GTCTGATAACGACAAGACCAACGTC AAGGCCACCTGGAGCAAGGTTGG
SP1349_Alpha2_F1.1_A05 GTCTGATAACGACAAGACCAACGTC AAGGCCACCTGGAGCAAGGTTGG
uSerAspAsnAspLysThrAsnValLysAlaThrTrpSerLysValGl

60      70      80      90
...|. . . .|. . . .|. . . .|. . . .|. . . .|. . . .|. . . .|IVS1→
Loxodonta africana  CGACCACGCTTCGGATTATGTCGCCGAGGCCCTGGAGAGgtgaggatc
Elephas maximus   CGACCACGCTTCGGATTATGTCGCCGAGGCCCTGGAGAGgtgaggatc
SP1349_Alpha2_R1.3_B05 CGACCACGCTTCGGAT-----
SP1349_Alpha2_R1.3_C01 CGACCACGCTTCGGAT-----
SP1349_Alpha2_F1.1_B01 CGACCACGCTTCGGATTATGTCGCCGAGGCCCTGGAGAGgtga----
SP1349_Alpha2_F1.1_A05 CGACCACGCTTCGGATTATGTCGCCGAGGCCCTGGAGAGgtga----
yAspHisAlaSerAspTyrValAlaGluAlaLeuGluAr

Loxodonta africana  ccctgtcccctacttccacgcacctggggtcaacaccaccccactgc
Elephas maximus   ccctgtcccctacttccacgcacctggggtcaacaccaccccactgc

Loxodonta africana  ccacgcgtgggctacaaccaggccggtgtctaggcccaaggccccga
Elephas maximus   ccacgcgtgggctacaaccaggccggtgtctaggcccaaggccccga

Loxodonta africana  tgcccagaccaccgacctcccgccaggggagcccggccctcctatccg
Elephas maximus   tgcccagaccaccgacctcccgccaggggagcccggccctcctatccg

Loxodonta africana  ccctccctcagaggctgtgtgtgtgtctcctgttcccctaccctacc
Elephas maximus   ccctccctcagaggctgtgtgtgctctcctgtctcccctaccctacc
SP1349_Alpha2_R2.2N_B02 -----cc
SP1349_Alpha2_R2.2N_F02 -----cc

```

```

                                                    96           100
                                                    .....|.....|...
Loxodonta africana          ctccaccaccgctcacctgccacttctccacgcagGATGTTCTTCTCC
Elephas maximus          ctccaccaccgctcacctgccacttctccacgcagGATGTTCTTCTCC
SP1349_Alpha2_R2.2N_B02    ctccaccaccgctcacctgccacttctccacgcagGATGT-----
SP1349_Alpha2_R2.2N_F02    ctccaccaccgctcacctgccacttctccacgcagGA-----
SP1349_Alpha2_F2N_A02      -----ctgccacttctccacgcagGATGTTCTTCTCC
SP1349_Alpha2_F2N_E02      -----gccacttctccacgcagGATGTTCTTCTCC
SP1349_Alpha2_R2.3N_E01    -----CC
                                                    gMetPhePheSer

          110           120           130           140           150
          .|.....|.....|.....|.....|.....|.....|.....|.....|.....|..
Loxodonta africana          TTTCCACCACCAAGACCTACTTTCCTCACTTCGACCTGGCCATGGC
Elephas maximus          TTTCCACCACCAAGACCTACTTTCCTCACTTCGACCTGAGCCATGGC
SP1349_Alpha2_F2N_A02      TTTCCACCACC-----
SP1349_Alpha2_F2N_E02      TTTCCACCACC-----
SP1349_Alpha2_R2.3N_E01    TTTCCACCACCAAGACCTACTTTCCTCACTTCGACCTGAGCCATGGC
SP1349_Alpha2_F2.3_D01     -----CCAAGACCTACTTTCCTCACTTCGACCTGAGCCATGGC
SP1349_Alpha2_R2.3N_H05    -----GACCTACTTTCCTCACTTCGACCTGAGCCATGGC
SP1349_Alpha2_F2.3N_G05    -----GGC
PheProThrThrLysThrTyrPheProHisPheAspLeuSerHisGly

          160           170           180           190           200
          ...|.....|.....|.....|.....|.....|.....|.....|.....|.....
Loxodonta africana          TCTGGCCAGGTCAAGGCACATGGCAAGAAGGTGGGGGAAGCACTGACC
Elephas maximus          TCTGGCCAGGTCAAGGGACATGGCAAGAAGGTGGGGGAAGCACTGACC
SP1349_Alpha2_R2.3N_E01    TCTGGCCAGGTCAAGGGACATGGCAAGAAGGTGGGGGAAGCAC-----
SP1349_Alpha2_R2.3_D01     TCTGGCCAGGTCAAGGGACATGGCAAGAAGGTGGGGGAAGCACTGACC
SP1349_Alpha2_R2.3N_H05    TCTGGCCAGGTCAAGGGAC-----
SP1349_Alpha2_F2.3N_G05    TCTGGCCAGGTCAAGGGACATGGCAAGAAGGTGGGGGAAGCACTGACC
SP1349_Alpha2_R2.4N_D02    -----CC
SerGlyGlnValLysGlyHisGlyLysLysValGlyGluAlaLeuThr

          210           220           230           240           250
          |.....|.....|.....|.....|.....|.....|.....|.....|.....|..
Loxodonta africana          CAAGCTGTTGGCCACCTGGATGACCTGCCTAGCGCCCTGTCTGCACTC
Elephas maximus          CAAGCTGTTGGCCACCTGGATGACCTGCCTAGCGCCCTGTCTGCACTC
SP1349_Alpha2_F2.3_D01    CAAGCT-----
SP1349_Alpha2_R2.3N_G05    CAAGCT-----
SP1349_Alpha2_R2.4N_D02    CAAGCTGTTGGCCACCTGGATGAYCTGCCTAGCGCCCTGTCTGCACTC
SP1349_Alpha2_R2.4N_H02    ---GCTGTTGGCCACCTGGATGACCTGCCTAGCGCCCTGTCTGCACTC
SP1349_Alpha2_F2.4_C02     -----CTGCCTAGCGCCCTGTCTGCACTC
SP1349_Alpha2_F2.4N_G02    -----TGCCCTAGCGCCCTGTCTGCACTC
GlnAlaValGlyHisLeuAspAspLeuProSerAlaLeuSerAlaLeu

          260           270           280           290           300
          ..|.....|.....|.....|.....|.....|.....|.....|.....|.....|
Loxodonta africana          AGCGACCTGCACGCTCACAAGCTGAGGGTGGACCCGTGCAACTTCAAG
Elephas maximus          AGCGACCTGCACGCTCACAAGCTGAGGGTGGACCCGTGCAACTTCAAG
SP1349_Alpha2_R2.4N_D02    AGCGACCTGCACGCTCACAAGCTGAGG-----
SP1349_Alpha2_R2.4N_H02    AGCGACCTGCACGCTCACAAGCTGAGG-----
SP1349_Alpha2_F2.4_C02     AGCGACCTGCACGCTCACAAGCTGAGGGTGGACCCGTGCAACTTCAAG
SP1349_Alpha2_F2.4N_G02    AGCGACCTGCACGCTCACAAGCTGAGGGTGGACCCGTGCAACTTCAAG
SerAspLeuHisAlaHisLysLeuArgValAspProValAsnPheLys

IVS2→
Loxodonta africana          gtgaggagagggaaagacctggaaggtcggggcagcaggccttctctgg

```

*Elephas maximus*  
 SP1349\_Alpha2\_F2.4\_C02  
 SP1349\_Alpha2\_F2.4N\_G02

gtgaggagaggggaagacctggaaggtcggggcagcaggccttcctgg  
 gtga-----  
 gtga-----

*Loxodonta africana*  
*Elephas maximus*  
 SP1349\_Alpha2\_R3.2\_C02  
 SP1349\_Alpha2\_R3.2N\_E02

cagggccgagatctgcaaaggtgagcgttcacctaacagcccccttgtc  
 cagggccgagatctgcaaaggtgagggttccctaacagcccccttgtc  
 -----cccccttgtc  
 -----cccccttgtc

*Loxodonta africana*  
*Elephas maximus*  
 SP1349\_Alpha2\_R3.2\_C02  
 SP1349\_Alpha2\_R3.2N\_E02  
 SP1349\_Alpha2\_F3N\_B02  
 SP1349\_Alpha2\_F3N\_D02  
 SP1349\_Alpha2\_R3N\_H02

301 310 320 330  
 ....|....|....|....|....|....|....|  
 ggccccctctctccacagCTCCTGAGCCACTGCCTGCTGGTGACTCTGA  
 gccccctctctccacagCTCCTGAGCCACTGCCTGCTGGTGACTCTAA  
 gccccctctctccacagCTCCTGAGCCACTGCCTGCTGG-----  
 gccccctctctccacagCTCCTGAGCCACTGCCTGCTGG-----  
 -----CTCCTGAGCCACTGCCTGCTGGTGACTCTGA  
 -----CTCCTGAGCCACTGCCTGCTGGTGACTCTGA  
 -----AGCCACTGCCTGCTGGTGACTCTGA  
**LeuLeuSerHisCysLeuLeuValThrLeuS**

*Loxodonta africana*  
*Elephas maximus*  
 SP1349\_Alpha2\_F3N\_B02  
 SP1349\_Alpha2\_F3N\_D02  
 SP1349\_Alpha2\_R3N\_H02  
 SP1349\_Alpha2\_F3.1N\_G02  
 SP1349\_Alpha2\_R3N\_D03  
 SP1349\_Alpha2\_F3.2\_C03  
 SP1349\_Alpha2\_F3.2\_F01  
 SP1349\_Alpha2\_R3\_G01  
 SP1349\_Alpha2\_F3.2\_H01  
 SP1349\_Alpha2\_R3\_B02

340 350 360 370  
 ...|...|...|...|...|...|...|...|...|...|...  
 GCAGCCACCAACCCACGGAGTTCACCCCTGAGGTCCATGCCTCCCTGG  
 GCAGCCACCAACCCACGGAGTTCACCCCTGAGGTCCATGCCTCCCTGG  
 GCAGCCACCAACCCACGGA-----  
 GCAGCCACCAACCCACGGA-----  
 GCAGCCACCAACCCACGGAGTTCACCCCTGAGGTCCATGCCTCCCTGG  
 ---GCCACCAACCCACGGAGTTCACCCCTGAGGTCCATGCCTCCCTGG  
 -----AACCCACGGAGTTCACCCCTGAGGTCCATGCCTCCCTGG  
 -----CATGCCTCCCTGG  
 -----AGTTCACCCCTGAGGTCCATGCCTCCCTGG  
 -----AACCCACGGAGTTCACCCCTGAGGTCCATGCCTCCCTGG  
 -----TTCACCCCTGAGGTCCATGCCTCCCTGG  
 -----AACCCACGGAGTTCACCCCTGAGGTCCATGCCTCCCTGG  
**erSerHisGlnProThrGluPheThrProGluValHisAlaSerLeuA**

*Loxodonta africana*  
*Elephas maximus*  
 SP1349\_Alpha2\_F3.1N\_G02  
 SP1349\_Alpha2\_R3N\_H02  
 SP1349\_Alpha2\_R3N\_D03  
 SP1349\_Alpha2\_F3.2\_C03  
 SP1349\_Alpha2\_F3.2\_F01  
 SP1349\_Alpha2\_R3\_G01  
 SP1349\_Alpha2\_F3.2\_H01  
 SP1349\_Alpha2\_R3\_B02

380 390 400 410 420  
 |...|...|...|...|...|...|...|...|...|...|...|  
 ACAAGTTCCTCAGCAACGTGAGCACCCTGACCTCCAAATATCGT  
 ACAAGTTCCTTAGCAACGTGAGCACCCTGACCTCCAAATATCGT  
 ACAAGTTCCTCAGCAACGTGAGCACCCTGACCTCCAAAT-----  
 ACAAGTTCCTCAGCAAC-----  
 ACAAGTTCCTCAGCAAC-----  
 ACAAGTTCCTCAGCAACGTGAGCACCCTGACCTCCAAAT-----  
 ACAAGTTCCTCAGCAACGTGAGCACCCTGACCTCCAAATATCGT  
 ACAAGTTCCTCAGCAACGTGAGCACCCTGACCTCCAAATATCGT  
 ACAAGTTCCTCAGCAACGTGAGCACCCTGACCTCCAAATATCGT  
 ACAAGTTCCTCAGCAACGTGAGCACCCTGACCTCCAAATATCGT  
**spLysPheLeuSerAsnValSerThrValLeuThrSerLysTyrArg**

*Loxodonta africana*  
*Elephas maximus*  
 SP1349\_Alpha2\_F3.2\_F01

+1 +10 +20 +30 +40  
 ...|...|...|...|...|...|...|...|...|...|...|  
**TAA**GCTGGACCCCAGGAGAGGTGCCACTGGCCTTCCTCCCCCTCCCTGC  
**TAA**GCTGGACCCCAGGAGAGGTGCCACTGGCCTTCCTCCCCCTCCCTGC  
**TAA**GCTGGACCCCAGGAGAGG-----

SP1349\_Alpha2\_R3\_G01  
 SP1349\_Alpha2\_F3.2\_H01  
 SP1349\_Alpha2\_R3\_B02

**TAA**GCTGGACCCAGGAGAGG-----  
**TAA**GCTGGACCCAGGAGAGG-----  
**TAA**GCTGGACCCAGGAGAGG-----

*Loxodonta africana*  
*Elephas maximus*

+50 +60 +70 +80 +90  
 |...|...|...|...|...|...|...|...|...|..  
 ATGTGCCACCAAGTCTTTGAATAAACTCTGAGTGGGCAGCagcctggt  
 ATGTGCCACCAAGTCTTTGAATAAACTCTGAGTGGGCAGCagcctggt  
 'AATAAA'



Supplementary Figure 3. DNA sequences of African elephant (*Loxodonta africana*), Asian elephant (*Elephas maximus*) and woolly mammoth (*Mammuthus primigenius*) *HBB/D* globin genes amplified in this study. Consensus sequences are presented for the two extant species while the 21 separate direct sequencing reactions (F=forward, R=reverse) from woolly mammoth specimen SP1349 are given. The transcribed mRNA sequence is identified by upper case letters, while intervening and nontranscribed flanking sequences are shown in lower case. Initiation (ATG) and stop (TGA) codons are underlined and bold. The 5' upstream transcriptional control motifs necessary for transcription of a functional product ('CACCC', 'CCAAT', 'ATA'), the mRNA cap site ('CAP') and the 3' poly-adenylation signal ('AATAAA') are underlined. Synonymous and nonsynonymous nucleotide changes are denoted by red and bold red characters, respectively. Within each coding block, the translated amino-acid sequences of the expressed woolly mammoth  $\beta/\delta$ -globin chain are listed below the corresponding base triplets.

```

-160      -150      -140      -130      -120
...|. ...|. ...|. ...|. ...|. ...|. ...|. ...|. ...|.
Loxodonta africana   gcctcaccctgcagaaccaaccctggccttggccaatctg:tcacaa
Elephas maximus    gcctcaccctgcagaaccaaccctggccttggccaatctgctcacia
SP1349_Delta_Upstr_R_E01  ---taccctgcagaaccaaccctggccttggccaatctgctcacia
SP1349_Delta_Upstr_R_B02  ---taccctgcagaaccaaccctggccttggccaatctgctcacia
SP1349_Delta_Upstr_R_G03  -----agaaccacaccctggccttggccaatctgctcacia
SP1349_Delta_Upstr_F_F03  -----cacaccctggccttggccaatctgctcacia
SP1349_Delta_Upstr_F_A02  -----cacaccctggccttggccaatctgctcacia
                        'CACCC'      'CACCC'      'CCAAT'

-110      -100      -90      -80      -70
...|. ...|. ...|. ...|. ...|. ...|. ...|. ...|. ...|.
Loxodonta africana   gagcaaaaagggcaggaccagggttgggcatataaggaagagtagtgc
Elephas maximus    gagcaaaaagggcaggaccagggttgggcatataaggaagagtagtgc
SP1349_Delta_Upstr_R_E01  gagcaaaaagggcaggaccagggttgggcatataaggaagagtagtgc
SP1349_Delta_Upstr_R_B02  gagcaaaaagggcaggaccagggttgggcatataaggaagagtagtgc
SP1349_Delta_Upstr_R_G03  gagcaaaaagggcaggaccagggttgggcatataaggaagagtagtgc
SP1349_Delta_Upstr_F_F03  gagcaaaaagggcaggaccagggttgggcatataaggaagagtagtgc
SP1349_Delta_Upstr_F_A02  gagcaaaaagggcaggaccagggttgggcatataaggaagagtagtgc
                        'ATA'

-60      -50      -40      -30      -20
|. ...|. ...|. ...|. ...|. ...|. ...|. ...|. ...|. ...|.
Loxodonta africana   cagctgctgtttACACTCACTTCTGACACAACTGTGTTGACTAGCAAC
Elephas maximus    cagctgctgtttACACTCACTTCTGACACAACTGTGTTGACTAGCAAC
SP1349_Delta_Upstr_R_E01  cagctgct-----
SP1349_Delta_Upstr_R_B02  cagctgctg-----
SP1349_Delta_Upstr_R_G03  cagctgct-----
SP1349_Delta_Upstr_F_F03  cagctgctgttt-----
SP1349_Delta_Upstr_F_A02  cagctgctgttt-----
SP1349_Delta_R1N_F02     cagctgctgtttACACTCACTTCTGACACAACTGTGTTGACTAGCAAC
SP1349_Delta_F1N_E02     -----TTCTGACACAACTGTGTTGACTAGCAAC
                        'CAP'

-10      1      10      20      30
.|. ...|. ...|. ...|. ...|. ...|. ...|. ...|. ...|. ..
Loxodonta africana   TACCCAATCAGACACCATGGTGAATCTGACTGCTGCTGAGAAAGACACA
Elephas maximus    TACCCAATCAGACACCATGGTGAATCTGACTGCTGCTGAGAAAGACACA
SP1349_Delta_R1N_F02  TACCCAATCAGACACCATGGTGAATCTGACTGCTGCTGAGAAAGACACA
SP1349_Delta_F1N_E02  TACCCAATCAGACACCATGGTGAATCTGACTGCTGCTGAGAAAGACACA
                        ValAsnLeuThrAlaAlaGluLysThrG1

Mammoth A G (T12A) change
↓ 40      50      60      70      80
..|. ...|. ...|. ...|. ...|. ...|. ...|. ...|. ...|.

```

*Loxodonta africana*  
*Elephas maximus*  
 SP1349\_Delta\_R1N\_F02  
 SP1349\_Delta\_F1N\_E02  
 SP1349\_Delta\_R2N\_H02  
 SP1349\_Delta\_F2N\_G02  
 SP1349\_Delta\_R2N\_B01  
 SP1349\_Delta\_F2N\_A01  
 SP1349\_Delta\_R2N\_D01  
 SP1349\_Delta\_F2N\_C01

AGTCACCAACCTGTGGGGCAAGGTGAATGTGAAAGAGCTTGGTGGTGA  
 AGTCACCAACCTGTGGGGCAAGGTGAATGTGAAAGAGCTTGGTGGTGA  
 AGTC**G**CCAACCTG-----  
 AGTC**G**CCAACCTGTGGGGCAAGGTGAATGT-----  
 -----GGCAAGGTGAATGTGAAAGAGCTTGGTGGTGA  
 -----CTTGGTGGTGA  
 -----GGCAAGGTGAATGTGAAAGAGCTTGGTGGTGA  
 -----GGTGAATGTGAAAGAGCTTGGTGGTGA  
 -----CAAGGTGAATGTGAAAGAGCTTGGTGGTGA  
 -----GGTGAATGTGAAAGAGCTTGGTGGTGA  
**nValAlaAsnLeuTrpGlyLysValAsnValLysGluLeuGlyGlyGl**

90

....|....|..IVS1→

*Loxodonta africana*  
*Elephas maximus*  
 SP1349\_Delta\_R2N\_H02  
 SP1349\_Delta\_F2N\_G02  
 SP1349\_Delta\_R2N\_B01  
 SP1349\_Delta\_F2N\_A01  
 SP1349\_Delta\_R2N\_D01  
 SP1349\_Delta\_F2N\_C01

GGCCCTGAGCAGgtttctatctaggttgcaaggtagacttaaggaggg  
 GGCCCTGAGCAGgtttctatctaggttgcaaggtagacttaaggaggg  
 GGCCCTGAGCAGgtttctatctaggttgcaaggtagacttaaggaggg  
 GGCCCTGAGCAGgtttctatctaggttgcaaggtagacttaaggaggg  
 GGCCCTGAGCAGgtttctatctaggttgcaaggtagacttaaggaggg  
 GGCCCTGAGCAGgtttctatctaggttgcaaggtagacttaaggaggg  
 GGCCCTGAGCAGgtttctatctaggttgcaaggtagacttaaggaggg  
 GGCCCTGAGCAGgtttctatctaggttgcaaggtagacttaaggaggg  
**uAlaLeuSerAr**

*Loxodonta africana*  
*Elephas maximus*  
 SP1349\_Delta\_R2N\_H02  
 SP1349\_Delta\_F2N\_G02  
 SP1349\_Delta\_R2N\_B01  
 SP1349\_Delta\_F2N\_A01  
 SP1349\_Delta\_R2N\_D01  
 SP1349\_Delta\_R2\_EO2  
 SP1349\_Delta\_F2.2\_D02  
 SP1349\_Delta\_R3N\_E03

ttgagtggggctgggcatgtggagacagaacagtctcccagtttctga  
 ttgagtggggctgggcatgtggagacagaacagtctcccagtttctga  
 ttgagtggg-----  
 ttgagtggggctgggcatgtggagacagaacag-----  
 ttgagtggggctgggcatgtggagacagaacag-----  
 ttgagtggggctgggcatgtggagacagaacag-----  
 ttgagtggggctgggcatgtggagacag-----  
 ttgagtggggctgggcatgtggagacagaacag-----  
 -----gggctgggcatgtggagacagaacagtctcccagtttctga  
 -----atgtggagacagaacagtctcccagtttctga  
 -----a

93

..|. |.

*Loxodonta africana*  
*Elephas maximus*  
 SP1349\_Delta\_R2\_EO2  
 SP1349\_Delta\_F2.2\_D02  
 SP1349\_Delta\_R3N\_E03  
 SP1349\_Delta\_F3N\_D03

caggcactgacttcctctgcaccctgtggtgctttcaccttcagGCTG  
 caggcactgacttcctctgcaccctgtggtgctttcaccttcagGCTG  
 ca-----  
 cag-----  
 caggcactgacttcctctgcaccctgtggtgctttcaccttcagGCTG  
 -----ctgtggtgctttcaccttcagGCTG  
**gLeu**

100 110 120 130 140

...|...|...|...|...|...|...|...|...|...|...

*Loxodonta africana*  
*Elephas maximus*  
 SP1349\_Delta\_R3N\_E03  
 SP1349\_Delta\_F3N\_D03

CTGGTGGTCTACCCATGGACCCGGAGGTTCTTTGAACACTTTGGGGAC  
 CTGGTGGTCTACCCATGGACCCGGAGGTTCTTTGAACACTTTGGGGAC  
 CTGGTGGTCTACCCATGGACCCGGAGGTTCTTTGAACACTTTGGGGAC  
 CTGGTGGTCTACCCATGGACCCGGAGGTTCTTTGAACACTTTGGGGAC  
**LeuValValTyrProTrpThrArgArgPhePheGluHisPheGlyAsp**

150 160 170 180 190

|...|...|...|...|...|...|...|...|...|..

*Loxodonta africana*  
*Elephas maximus*  
 SP1349\_Delta\_R3N\_E03  
 SP1349\_Delta\_F3N\_D03

CTGTCCACTGCTGA**A**GCTGTCCTGCACAACGCTAAAGTGCTGGCCCAT  
 CTGTCCACTGCTGACGCTGTCCTGCACAACGCTAAAGTGCTGGCCCAT  
 CTGTCCACTGCTGACGCTGTCCTGCACAACG-----  
 CTGTCCACTGCTGACGCTGTCCTGCACAACGCTAAAGTGCTGGCCCAT

SP1349\_Delta\_R4\_B01

-----GTGCTGGCCCAT  
**LeuSerThrAlaAspAlaValLeuHisAsnAlaLysValLeuAlaHis**

*Loxodonta africana*  
*Elephas maximus*  
 SP1349\_Delta\_F3N\_D03  
 SP1349\_Delta\_R4\_B01  
 SP1349\_Delta\_F4.1N\_A01

                  200          210          220          230          240  
 ..|. ...|. ...|. ...|. ...|. ...|. ...|. ...|. ...|  
 GGCGAGAAAGTGTGACCTCCTTTGGTGAGGGCTGAAGCACCTGGAC  
 GGCGAGAAAGTGTGACCTCCTTTGGTGAGGGCCTGAAGCACCTGGAC  
 GG-----  
 GGCGAGAAAGTGTGACCTCCTTTGGTGAGGGCCTGAAGCACCTGGAC  
 -----AGTGTGACCTCCTTTGGTGAGGGCCTGAAGCACCTGGAC  
**GlyGluLysValLeuThrSerPheGlyGluGlyLeuLysHisLeuAsp**

*Loxodonta africana*  
*Elephas maximus*  
 SP1349\_Delta\_R4\_B01  
 SP1349\_Delta\_F4.1N\_A01

                          Mammoth G T (A86S) change  
                           ↓  
                   250          260          270          280  
 ....|. ...|. ...|. ...|. ...|. ...|. ...|. ...|. ...|  
 AACCTCAAGGGCACCTTTGCCGATCTGAGCGAGCTGCACCTGTGACAAG  
 AACCTCAAGGGCACCTTTGCCGATCTGAGCGAGCTGCACCTGTGACAAG  
 AACCTCAAGGGCACCTTT**T**CCGATCTGAGCGAGCTGCACCTGTGACAAG  
 AACCTCAAGGGCACCTTT**T**CCGATCTGAGCGAGCTGCACCTGTGACAAG  
**AsnLeuLysGlyThrPheSerAspLeuSerGluLeuHisCysAspLys**

*Loxodonta africana*  
*Elephas maximus*  
 SP1349\_Delta\_R4\_B01  
 SP1349\_Delta\_F4.1N\_A01

                          Mammoth G C (E101Q) change  
                           ↓  
                   290          30          310  
 .|. ...|. ...|. ...|. ...|. ...| IVS2→  
 CTGCACGTGGATCCTGAGAATTTTCAGGgtgagtctaggagacattcta  
 CTGCACGTGGATCCTGAGAATTTTCAGGgtgagtctaggagacattcta  
 CTGCACGTGGATCCT**C**AGA-----  
 CTGCACGTGGATCCT**C**AGAATTTTCAGGgtgagtctaggagacattcta  
**LeuHisValAspProGlnAsnPheArg**

*Loxodonta africana*  
*Elephas maximus*

ttttttcttttccactttgtagtctttcactgtcattatthttgcttatt  
 ttttttcttttccactttgtagtctttcactgtcattatthttgcttatt

*Loxodonta africana*  
*Elephas maximus*

tgaatttcctctgtatctctttttactcgactatgthttcatcatttag  
 tgaatttcctctgtatctctttttactcgactatgthttcatcatttag

*Loxodonta africana*  
*Elephas maximus*

tgctttttcaacttataccattttgtattactttttctttcaatattct  
 tg**t**ttttttcaacttataccattttgtattactttttctttcaatattct

*Loxodonta africana*  
*Elephas maximus*

tccttttttctgactcacattcttgctttatatcatgctctttattt  
 tccttttttctgactcacattcttgctttatatcatgctctttattt

*Loxodonta africana*  
*Elephas maximus*

aatttcctacgthttttgctcttgctctccctttctcctagtttccttc  
 aatttcct**g**cgthttttgctcttgctctccctttctccta**a**tttccttc

*Loxodonta africana*  
*Elephas maximus*

cctctgaacagtaccagaatgtgcataccacctctcatccactattt  
 cctctgaacagtacc**a**aatgtgcataccacctctc**g**tccactattt

*Loxodonta africana*  
*Elephas maximus*

ctgcaactggggcaaatccccaccctcctccatagagggttgaaag  
 ctgcaactggggcaaatccccaccctcctccatagagggttgaaag

*Loxodonta africana*  
*Elephas maximus*

gactgaatcaaagaggagaggatcatcgtgctgtttctagagctgtgga  
 gactgaatcaaagaggagaggatcat**g**gtgctgtttctagag**a**tgtga

*Loxodonta africana*  
*Elephas maximus*

ttcattttcagacttgaaggataacttgaataatataaaatcaggagta  
 ttcattttcagacttgaaggataacttgaataatataaaatcaggagta

*Loxodonta africana*  
*Elephas maximus*

aatggagaggaaagttagtctgagaatgaaagatcagaaggtcata  
 aatggagaggaaagttagtctgagaatgaaagatcagaaggtcata

*Loxodonta africana* gacgagatggggagcagaagttactaagaaactgaccattgtggctat  
*Elephas maximus* gacgagatggggagcagaagttactaagaaactgaccattgtggctat

*Loxodonta africana* aattaatcacttaattagttaattaatgatgtttgttatttattcacgt  
*Elephas maximus* aattaatcacttaattagttaattaatgatgtttgttatttattcacgt

*Loxodonta africana* ttttcattttgggtgggagtaaatttgggctagtgtgtgggcaacataa  
*Elephas maximus* ttttcattttgggtgggagtaaatttgggctagtgtgtgggcaacataa

*Loxodonta africana* atgggtttcaccccattgtctcagaggccaagctggattgctttgtta  
*Elephas maximus* atgggtttcaccccattgtctcagaggccaagctggattgctttgtta

320

*Loxodonta africana* .....|.....|..  
*Elephas maximus* accatgtctgtgatgtatctacctcttccccatagCTCCTGGGCAAT  
 SP1349\_Delta\_R5N\_D02 accatgtctgtgatgtatctacctcttccccatagCTCCTGGGCAAT  
 SP1349\_Delta\_R5N\_G03 -----CTCCTGGGCAAT  
 -----CTCCTGGGCAAT  
**LeuLeuGlyAsn**

330            340            350            360            370

*Loxodonta africana* ..|...|...|...|...|...|...|...|...|...|  
*Elephas maximus* GTGCTGGTGATTGCCTGGCCCGCCACTTTGGCAAGGAATTCACCCCA  
 SP1349\_Delta\_R5N\_D02 GTGCTGGTGATTGCCTGGCCCGCCACTTTGGCAAGGAATTCACCCCA  
 SP1349\_Delta\_R5N\_G03 GTGCTGGTGATTGCCTGGCCCGCCACTTTGGCAAGGAATTCACCCCA  
 SP1349\_Delta\_F5\_F03 GTGCTGGTGATTGCCTGGCCCGCCACTTTGGCAAGGAATTCACCCCA  
 -----CCCGCCACTTTGGCAAGGAATTCACCCCA  
**ValLeuValIleValLeuAlaArgHisPheGlyLysGluPheThrPro**

380            390            400            410            420

*Loxodonta africana* .....|.....|.....|.....|.....|.....|.....|.....|.....|..  
*Elephas maximus* GATGTT CAGGCTGCCTATGAGAAGGTTGTGGCTGGTGTGGCGAATGCC  
 SP1349\_Delta\_R5N\_D02 GATGTT CAGGCTGCCTATGAGAAGGTTGTGGCTGGTGTGGCGAATGCC  
 SP1349\_Delta\_R5N\_G03 GATGTT CAGGCTGCCTATGAGAAGGTTGTGGCTGGTGTGGCGAATGCC  
 SP1349\_Delta\_F5\_F03 GATGTT CAGGCTGCCTATGAGAAGGTTGTGGCTGGTGTGGCGAATGCC  
**AspValGlnAlaAlaTyrGluLysValValAlaGlyValAlaAsnAla**

430            440 +1            +10            +20

*Loxodonta africana* .|...|...|...|...|...|...|...|...|...|..  
*Elephas maximus* CTGGCTCACAAATACCAC**TGAG**ATCCTGGCCTGTTCCCTGGTATCCATC  
 SP1349\_Delta\_R5N\_D02 CTGGCTCACAAATACCAC**TGAG**ATCCTGGCCTGTTCCCTGGTATCCATC  
 SP1349\_Delta\_R5N\_G03 CTGGCTCACAAATACCAC**TGAG**ATCCTGGCCTGTTCC-----  
 SP1349\_Delta\_F5\_F03 CTGGCTCACAAATACCAC**TGAG**ATC-----  
**LeuAlaHisLysTyrHis**

+30            +40            +50            +60            +70

*Loxodonta africana* ..|...|...|...|...|...|...|...|...|...|..  
*Elephas maximus* GGAAGCCCCATTTCCCGAGATGCTATCTCTGAATTTGGGAAAATAATG  
 SP1349\_Delta\_F5\_F03 GGAAGCCCCATTTCCCGAGATGCTATCTCTGAATTTGGGAAAATAATG  
 GGAAGCCCCA-----

+80            +90            +100            +110            +120

*Loxodonta africana* |...|...|...|...|...|...|...|...|...|..  
 CCAACTCTCAAGGGCATCTCTTCTGCCT**AATAA**AGTACTTTTCAGCTCa

*Elephas maximus*

CCAACTCTCAAGGCATCTCTTCTGCCTAATAAAAGTACTTTCAGCTCa  
**'AATAAA'**

Supplementary Figure 4. Clones of the woolly mammoth (SP1349) *HBB/D* region including the  $\beta/\delta 12Aa$  SNP at nucleotide position 37 (indicated in red), amplified in Adelaide using the SP1349\_Delta\_F1N/SP1349\_Delta\_R1N primers (see Supplementary Table 2). Dots indicate identical bases to those found in the direct sequence reads (top line; taken from Supplementary Fig. 3). The small amounts of sequence variation detected in clones is consistent with ancient DNA template damage<sup>7</sup>, but is at sufficiently low levels to be indistinguishable from background enzymatic error rates, which indicates that SP1349 has excellent ancient DNA preservation. Importantly, no variation is detected at the key non-synonymous nucleotide substitution at codon 12.

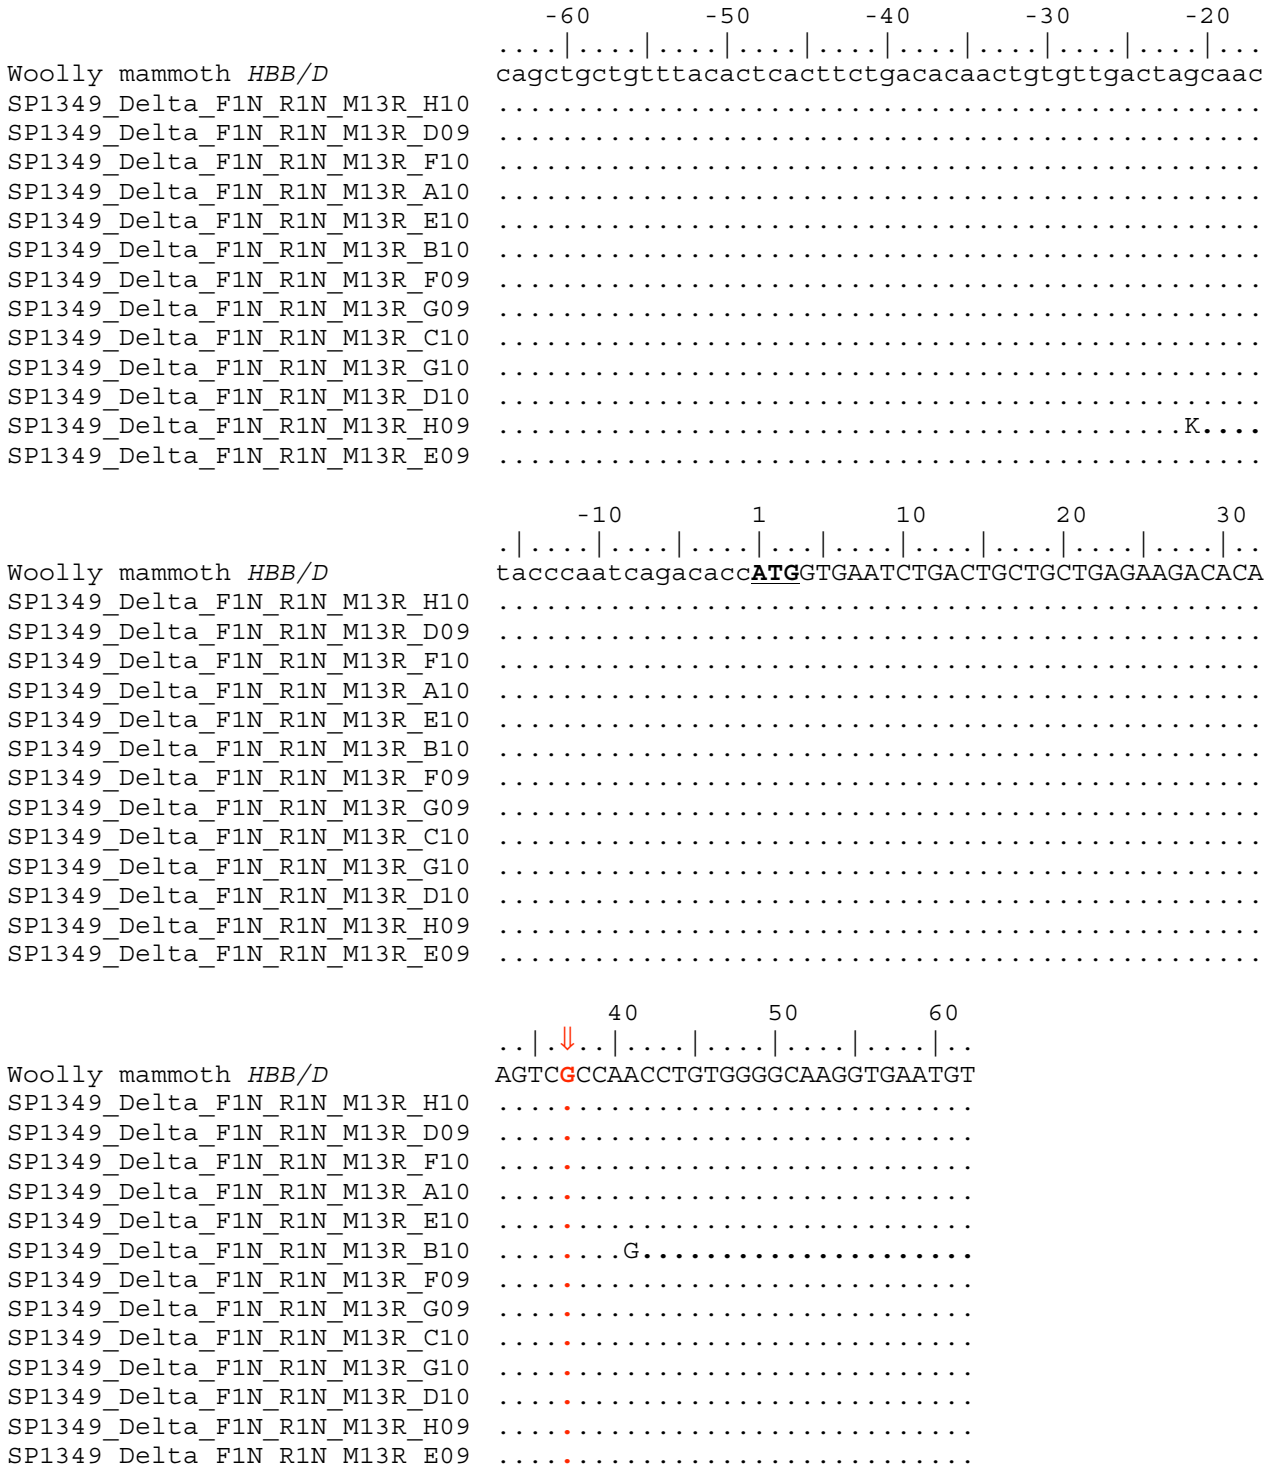

Supplementary Figure 5. Clones of the woolly mammoth (SP1349) *HBB/D* region covering the  $\beta/\delta 86\text{Ser}$  and  $\beta/\delta 101\text{Gln}$  SNPs at nucleotide positions 259 and 304, respectively (indicated in red), amplified in Adelaide using the primers SP1349\_Delta\_F4.1N/ SP1349\_Delta\_R4 (see Supplementary Table 2). Dots indicate identical bases to those found in the direct sequence reads (top line; taken from Supplementary Fig. 3). The very small amounts of sequence variation within the clones are consistent with ancient DNA damage (G A/C T transition substitutions)<sup>7</sup>, and are indistinguishable from background enzymatic error rates. This confirms that the preservation of DNA in SP1349 is of very high quality. Importantly, no variation is detected around the non-synonymous nucleotide substitutions at codons 86 and 101.

```

181          190          200          210          220          230
...|...|...|...|...|...|...|...|...|...|...|
Woolly mammoth HBB/D      GTGCTGGCCCATGGCGAGAAAAGTGTGACCTCCTTTGGTGAGGGCCTGAA
SP1349_F4.1N_R4_M13R_A01  .....A.....
SP1349_F4.1N_R4_M13R_E02  .....
SP1349_F4.1N_R4_M13R_G02  .....
SP1349_F4.1N_R4_M13R_C01  .....
SP1349_F4.1N_R4_M13R_E01  .....
SP1349_F4.1N_R4_M13R_G01  .....
SP1349_F4.1N_R4_M13R_D01  .....
SP1349_F4.1N_R4_M13R_F02  .....
SP1349_F4.1N_R4_M13R_H01  .....
SP1349_F4.1N_R4_M13R_F01  .....

          240          250          260          270          280
...|...|...|...|...|...|...|...|...|...|...|
Woolly mammoth HBB/D      GCACCTGGACAACCTCAAGGGCACCTTTTCCGATCTGAGCGAGCTGCACT
SP1349_F4.1N_R4_M13R_A01  .....
SP1349_F4.1N_R4_M13R_E02  .....
SP1349_F4.1N_R4_M13R_G02  .....
SP1349_F4.1N_R4_M13R_C01  .....
SP1349_F4.1N_R4_M13R_E01  .....
SP1349_F4.1N_R4_M13R_G01  .....T.....
SP1349_F4.1N_R4_M13R_D01  .....
SP1349_F4.1N_R4_M13R_F02  .....
SP1349_F4.1N_R4_M13R_H01  .....
SP1349_F4.1N_R4_M13R_F01  .....

          290          300          310
...|...|...|...|...|...|...|...|...|...|...|
Woolly mammoth HBB/D      GTGACAAGCTGCACGTGGATCCTCAGAAATTCAGGgtgagtctaggaga
SP1349_F4.1N_R4_M13R_A01  .....
SP1349_F4.1N_R4_M13R_E02  .....
SP1349_F4.1N_R4_M13R_G02  .....
SP1349_F4.1N_R4_M13R_C01  .....
SP1349_F4.1N_R4_M13R_E01  .....
SP1349_F4.1N_R4_M13R_G01  .....
SP1349_F4.1N_R4_M13R_D01  .....
SP1349_F4.1N_R4_M13R_F02  .....
SP1349_F4.1N_R4_M13R_H01  .....
SP1349_F4.1N_R4_M13R_F01  .....

```

Supplementary Figure 6. SNP targeting of the woolly mammoth specific A G substitution at codon 12 (Leipzig). Two to three independent PCR reactions were conducted on DNA extracted from three mammoth specimens. Note: SP1349 is the individual from which the complete *HBA-T2* and *HBB/D* coding sequences were determined (Supplementary Figs. 2–5). Clone sequences without primers (Delta\_Hem\_SNP1\_F and Delta\_Hem\_SNP1\_R) are given; dots indicate identical bases to those found in the woolly mammoth *HBB/D* gene (see Supplementary Fig. 3). The mammoth specific A G substitution at position 37 is indicated in red and was consistently recovered in the clones from PCR amplicons of specimens SP1349 and SP1419. Notably, this substitution was also detected in a 454 sequence read from specimen M4 (GenBank SRR006688.110153), which was the primary source of the complete mammoth nuclear genome sequence<sup>8</sup>. The expected G was also found in all three PCR reactions conducted on specimen SP1421, although exceptions were found in the first two PCR experiments. Such sequence variation is commonly observed in clones of PCR products from ancient specimens, and generally represents transition mutations characteristic of cytosine deamination on one or other of the source template strands<sup>7</sup>. This pattern is common in ancient DNA when small numbers of templates initiate PCR reactions, and the resulting clones exhibit high frequencies of G A/C T transition substitutions at a few positions<sup>7</sup>. The amount of sequence variation in the clones from the three specimens indicate that the DNA preservation in SP1349 is considerably better than the other two. Importantly, all “blank” (no DNA) negative controls revealed no sign of contamination.

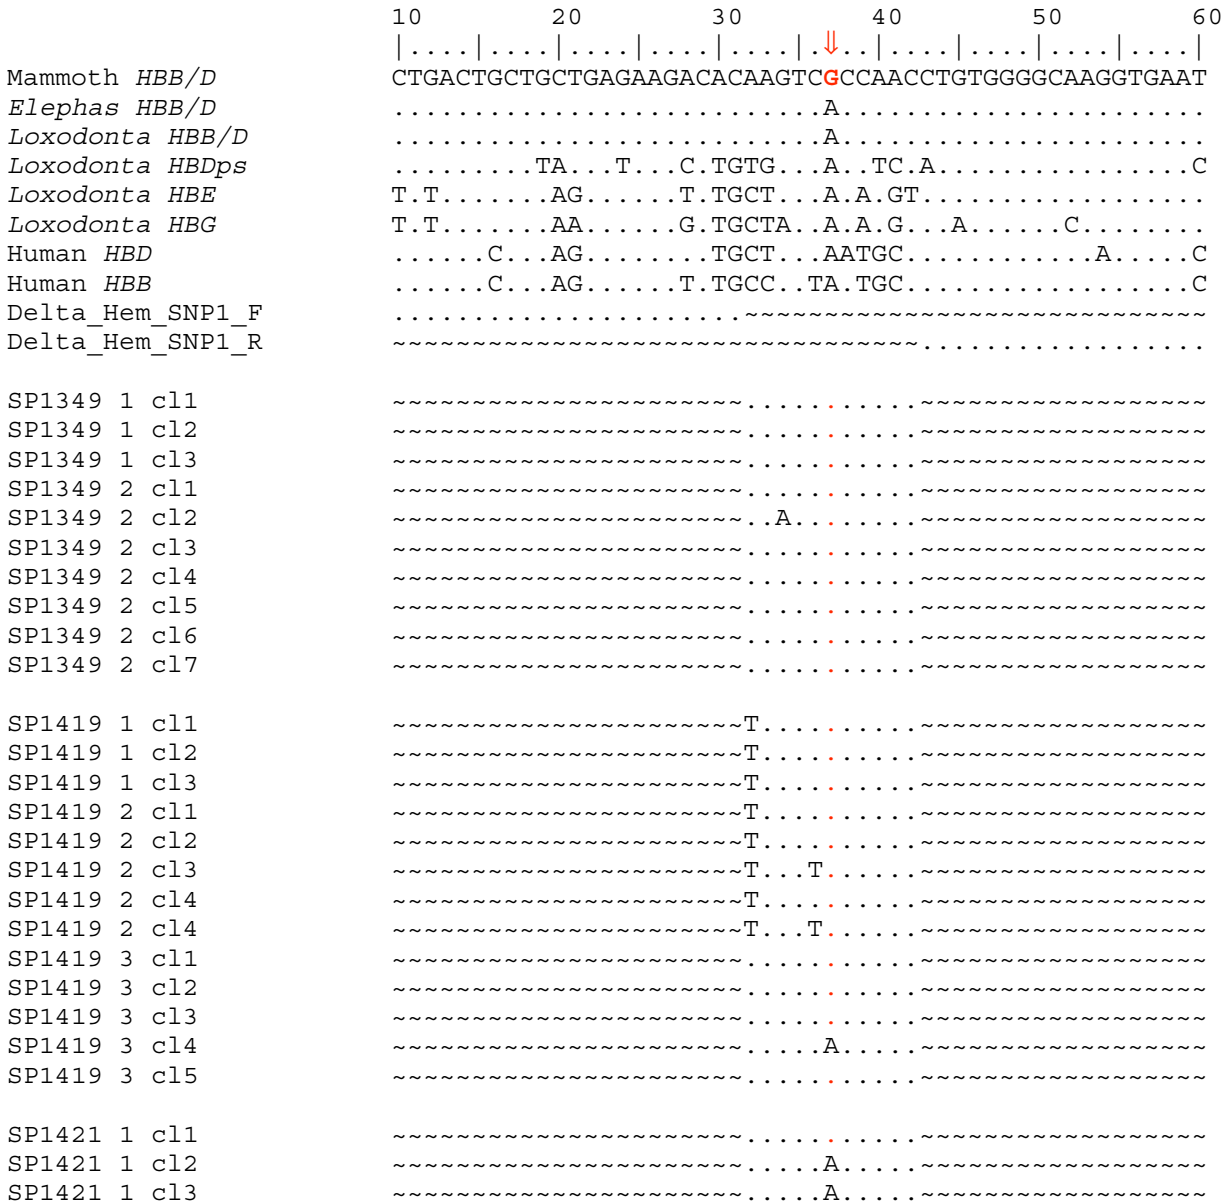



|        |   |     |                                 |
|--------|---|-----|---------------------------------|
| SP1421 | 1 | c14 | ~~~~~. . . . .A. . . . .~~~~~   |
| SP1421 | 2 | c11 | ~~~~~. . . . .A. . . . .~~~~~   |
| SP1421 | 2 | c12 | ~~~~~. . . . . . . . . . .~~~~~ |
| SP1421 | 2 | c13 | ~~~~~. A. A. . . . . .~~~~~     |
| SP1421 | 2 | c14 | ~~~~~. . . . . . . . . . .~~~~~ |
| SP1421 | 2 | c15 | ~~~~~. . . . . . . . . . .~~~~~ |
| SP1421 | 2 | c16 | ~~~~~. A. A. . . . . .~~~~~     |
| SP1421 | 2 | c17 | ~~~~~. A. A. . . . . .~~~~~     |
| SP1421 | 3 | c11 | ~~~~~. . . . . . . . . . .~~~~~ |
| SP1421 | 3 | c12 | ~~~~~. . . . . . . . . . .~~~~~ |
| SP1421 | 3 | c13 | ~~~~~. . . . . . . . . . .~~~~~ |
| SP1421 | 3 | c14 | ~~~~~. . . . . . . . . . .~~~~~ |

Supplementary Figure 7. SNP targeting of the woolly mammoth specific G T substitution at codon 86 (Leipzig). Unfortunately, no sequence reads from the mammoth genome project<sup>8</sup> covered this region. Anywhere from two to five independent PCR reactions were conducted on DNA extracted from four mammoth specimens. Note: SP1349 is the individual from which the complete *HBA-T2* and *HBB/D* coding sequences were determined (Supplementary Figs. 2–5). Clone sequences without primers (Delta\_Hem\_SNP2\_F and Delta\_Hem\_SNP2\_R) are given; dots indicate identical bases to those found in the woolly mammoth *HBB/D* gene (see Supplementary Fig. 3). The mammoth specific G T substitution at position 259 is indicated in red, and was consistently obtained from all clones of SP1349. However, numerous clones from the two less well-preserved specimens possessed “G” at this site, as observed in the *Loxodonta* and *Elephas HBB/D* gene, and the *Loxodonta* gamma (*HBG*), epsilon (*HBE*) and beta pseudogene (*HBBps*) loci. Since all “blank” (no DNA) negative controls revealed no sign of contamination, it appeared likely that one of the mammoth  $\beta$ -cluster paralogs had been co-amplified in the PCR reaction, due to the lack of suitable templates in the early rounds of the PCR. This result is also possibly exaggerated because it is very difficult to design gene-specific primers within the exon regions used here (as opposed to the larger amplifications performed in Adelaide; Supplementary Figs. 1–5 above). To investigate this issue further, and determine which of the  $\beta$ -cluster loci had amplified, a second reverse primer (Delta\_Hem\_SNP2\_R\_new; Table S3) was designed to amplify several distinguishing SNPs immediately outside the initially targeted region, and used on two problematic mammoth samples (SP1420, SP1421). The sequences of these clones (shown below the clones for the same specimen) show that the most likely explanation is that in addition to the target *HBB/D* locus, the mammoth *HBG* gene had co-amplified in some of the PCRs of both SP1419 and SP1421. It is important to note that since changes in the flanking region sequences mean that the primers would strongly preferentially bind to any authentic *HBB/D* loci that were present, if there had been any modern elephant contamination present it would have been highly likely to result in elephant *HBB/D* sequences (*i.e.*, not *HBG* or *HBE* paralogs). However, we also cannot entirely discount the possibility that these two individuals are heterozygotic at this site.

|                        | 230                                                                                                                                 | 240                             | 250                         | 260                      | 270                                        | 280                      |
|------------------------|-------------------------------------------------------------------------------------------------------------------------------------|---------------------------------|-----------------------------|--------------------------|--------------------------------------------|--------------------------|
| Mammoth <i>HBB/D</i>   | .   . . . .   . . . .   . . . .   . . . .   . . . .   . . . .   . . . .   . . . .   . . . .   . . . .   . . . .   . . . .   . . . . | AAGCACCTGGACAACCTCAAGGGCACCTTTT | ↓                           | CCGATCTGAGCGAGCTGCACTGTG |                                            |                          |
| <i>Elephas HBB/D</i>   | . . . . .                                                                                                                           | . . . . .                       | . . . . .                   | G                        | . . . . .                                  | . . . . .                |
| <i>Loxodonta HBB/D</i> | . . . . .                                                                                                                           | . . . . .                       | . . . . .                   | G                        | . . . . .                                  | . . . . .                |
| <i>Loxodonta HBDps</i> | . . T . . . . . A . . . . .                                                                                                         | . . . . .                       | . . . . .                   | . . . . .                | . . C . G . . . . . T . . . . .            | . . . . .                |
| <i>Loxodonta HBBps</i> | . . . . .                                                                                                                           | . . . . .                       | . . T . . T . . G . . . . . | . . . . .                | . . G . . C . G . . A . . TA . . . . .     | . . . . .                |
| <i>Loxodonta HBE</i>   | . . . A . A . . . . .                                                                                                               | . . . . .                       | . . . . .                   | . . . . .                | . . A . . G . . . . . G . TA . G . . . . . | . . . . .                |
| <i>Loxodonta HBG</i>   | . . . A . . . . .                                                                                                                   | . . . . .                       | . . . . .                   | . . . . .                | . . . . .                                  | . . G . TA . G . . . . . |
| Human <i>HBD</i>       | GCT . . . . .                                                                                                                       | . . . . .                       | . . . . .                   | T . . . . .              | . . TC . G . . . . .                       | . . T . . . . .          |
| Human <i>HBB</i>       | GCT . . . . .                                                                                                                       | . . . . .                       | . . . . .                   | . . . . .                | . . G . ACA . . . . .                      | . . T . . . . .          |
| Delta_Hem_SNP2_F       | ~ . . . . .                                                                                                                         | . . . . .                       | . . . . .                   | . . . . .                | . . . . .                                  | . . . . .                |
| Delta_Hem_SNP2_R       | ~ . . . . .                                                                                                                         | . . . . .                       | . . . . .                   | . . . . .                | . . . . .                                  | . . . . .                |
| D_Hem_SNP2_R_new       | ~ . . . . .                                                                                                                         | . . . . .                       | . . . . .                   | . . . . .                | . . . . .                                  | . . . . .                |
|                        |                                                                                                                                     |                                 |                             |                          |                                            |                          |
| SP1349 1 c11           | ~ . . . . .                                                                                                                         | . . . . .                       | . . . . .                   | . . . . .                | . . . . .                                  | . . . . .                |
| SP1349 1 c12           | ~ . . . . .                                                                                                                         | . . . . .                       | . . . . .                   | . . . . .                | . . . . .                                  | . . . . .                |
| SP1349 1 c13           | ~ . . . . .                                                                                                                         | . . . . .                       | . . . . .                   | . . . . .                | . . . . .                                  | . . . . .                |
| SP1349 1 c14           | ~ . . . . .                                                                                                                         | . . . . .                       | . . . . .                   | . . . . .                | . . . . .                                  | . . . . .                |
| SP1349 1 c15           | ~ . . . . .                                                                                                                         | . . . . .                       | . . . . .                   | . . . . .                | . . . . .                                  | . . . . .                |
| SP1349 2 c11           | ~ . . . . .                                                                                                                         | . . . . .                       | . . . . .                   | . . . . .                | . . . . .                                  | . . . . .                |
| SP1349 2 c12           | ~ . . . . .                                                                                                                         | . . . . .                       | . . . . .                   | . . . . .                | . . . . .                                  | . . . . .                |
| SP1349 2 c13           | ~ . . . . .                                                                                                                         | . . . . .                       | . . . . .                   | . . . . .                | . . . . .                                  | . . . . .                |
| SP1349 2 c14           | ~ . . . . .                                                                                                                         | . . . . .                       | . . . . .                   | . . . . .                | . . . . .                                  | . . . . .                |
| SP1349 2 c15           | ~ . . . . .                                                                                                                         | . . . . .                       | . . . . .                   | . . . . .                | . . . . .                                  | . . . . .                |
| SP1349 2 c16           | ~ . . . . .                                                                                                                         | . . . . .                       | . . . . .                   | . . . . .                | . . . . .                                  | . . . . .                |
| SP1349 3 c11           | ~ . . . . .                                                                                                                         | . . . . .                       | . . . . .                   | . . . . .                | . . . . .                                  | . . . . .                |
| SP1349 3 c12           | ~ . . . . .                                                                                                                         | . . . . .                       | . . . . .                   | . . . . .                | . . . . .                                  | . . . . .                |
|                        |                                                                                                                                     |                                 |                             |                          |                                            |                          |
| SP1419 1 c16           | ~ . . . . .                                                                                                                         | . . . . .                       | . . . . .                   | . . . . .                | . . . . .                                  | . . . . .                |
| SP1419 2 c11           | ~ . . . . .                                                                                                                         | . . . . .                       | . . . . .                   | . . . . .                | . . . . .                                  | . . . . .                |

```
SP1419 2 c16 ~~~~~ . . . . . ~~~~~
SP1419 3 c13 ~~~~~ . . . . . ~~~~~
SP1419 3 c16 ~~~~~ . . . . . ~~~~~
SP1419 1 c11 ~~~~~ . . . . . G. ~~~~~
SP1419 1 c12 ~~~~~ . . . . . G. ~~~~~
SP1419 1 c13 ~~~~~ . . . . . G. ~~~~~
SP1419 1 c14 ~~~~~ . . . . . GT ~~~~~
SP1419 1 c15 ~~~~~ . . . . . G. ~~~~~
SP1419 1 c17 ~~~~~ . . . . . G. ~~~~~
SP1419 2 c12 ~~~~~ . . . . . G. ~~~~~
SP1419 2 c13 ~~~~~ . . . . . G. ~~~~~
SP1419 2 c14 ~~~~~ . . . . . G. ~~~~~
SP1419 2 c15 ~~~~~ . . . . . G. ~~~~~
SP1419 2 c17 ~~~~~ . . . . . T . . . . . G. ~~~~~
SP1419 3 c11 ~~~~~ . . . . . G. ~~~~~
SP1419 3 c12 ~~~~~ . . . . . G. ~~~~~
SP1419 3 c14 ~~~~~ . . . . . G. ~~~~~
SP1419 3 c15 ~~~~~ . . . . . G. ~~~~~

SP1420 new c11 ~~~~~ . . . . . G.TA.G. ~~~~~
SP1420 new c12 ~~~~~ . . . . . G.TA.G. ~~~~~
SP1420 new c13 ~~~~~ . . . . . G.TA.G. ~~~~~
SP1420 new c14 ~~~~~ . . . . . G.TA.G. ~~~~~

SP1421 1 c12 ~~~~~ . . . . . . . ~~~~~
SP1421 1 c19 ~~~~~ . . . . . . . ~~~~~
SP1421 1 c111 ~~~~~ . . . . . . . ~~~~~
SP1421 1 c112 ~~~~~ . . . . . . . ~~~~~
SP1421 4 c11 ~~~~~ . . . . . . . ~~~~~
SP1421 4 c12 ~~~~~ . . . . . . . ~~~~~
SP1421 4 c13 ~~~~~ . . . . . . . ~~~~~
SP1421 4 c14 ~~~~~ . . . . . . T ~~~~~
SP1421 4 c15 ~~~~~ . . . . . . . ~~~~~
SP1421 4 c16 ~~~~~ . . . . . . . ~~~~~
SP1421 4 c17 ~~~~~ . . . . . . . ~~~~~
SP1421 4 c18 ~~~~~ . . . . . . . ~~~~~
SP1421 1 c11 ~~~~~ . . . . . G. ~~~~~
SP1421 1 c13 ~~~~~ . . . . . G. ~~~~~
SP1421 1 c14 ~~~~~ . . . . . G. ~~~~~
SP1421 1 c15 ~~~~~ . . . . . G. ~~~~~
SP1421 1 c16 ~~~~~ . . . . . G. ~~~~~
SP1421 1 c17 ~~~~~ . . . . . G. ~~~~~
SP1421 1 c18 ~~~~~ . . . . . G. ~~~~~
SP1421 1 c110 ~~~~~ . . . . . G. ~~~~~
SP1421 1 c113 ~~~~~ . . . . . G. ~~~~~
SP1421 1 c114 ~~~~~ . . . . . G. ~~~~~
SP1421 2 c11 ~~~~~ . . . . . G. ~~~~~
SP1421 2 c12 ~~~~~ . . . . . G. ~~~~~
SP1421 2 c13 ~~~~~ . . . . . G. ~~~~~
SP1421 2 c14 ~~~~~ . . . . . G. ~~~~~
SP1421 2 c15 ~~~~~ . . . . . G. ~~~~~
SP1421 2 c16 ~~~~~ . . . . . G. ~~~~~
SP1421 2 c17 ~~~~~ . . . . . G. ~~~~~
SP1421 3 c11 ~~~~~ . . . . . G. ~~~~~
SP1421 3 c12 ~~~~~ . . . . . G. ~~~~~
SP1421 3 c13 ~~~~~ . . . . . G. ~~~~~
SP1421 3 c14 ~~~~~ . . . . . A . . . . . G. ~~~~~
SP1421 3 c15 ~~~~~ . . . . . G. ~~~~~
SP1421 3 c16 ~~~~~ . . . . . G. ~~~~~
SP1421 3 c17 ~~~~~ . . . . . G. ~~~~~
SP1421 5 c11 ~~~~~ . . . . . G. ~~~~~
SP1421 5 c12 ~~~~~ . . . . . G. ~~~~~
SP1421 5 c13 ~~~~~ . . . . . G. ~~~~~
```

```
SP1421 5 c14 ~~~~~.G.~~~~~
SP1421 5 c15 ~~~~~.G.~~~~~
SP1421 5 c16 ~~~~~.G.~~~~~
SP1421 5 c17 ~~~~~.G.~~~~~
SP1421 5 c18 ~~~~~.G.~~~~~
SP1421 5 c19 ~~~~~.G.~~~~~
SP1421 new 1 c11 ~~~~~.G.TA.G.~~~~~
SP1421 new 1 c12 ~~~~~.G.TA.G.~~~~~
SP1421 new 1 c13 ~~~~~.A.~~~~~.G.TA.G.~~~~~
SP1421 new 1 c14 ~~~~~.G.TA.G.~~~~~
SP1421 new 2 c11 ~~~~~.G.TA.G.~~~~~
SP1421 new 2 c12 ~~~~~.G.TA.G.~~~~~
```

Supplementary Figure 8. SNP targeting of the woolly mammoth specific G C substitution at codon 101 (Leipzig). Unfortunately, no sequence reads from the mammoth genome project<sup>8</sup> covered this region. Three independent PCR reactions were conducted on DNA extracted from each of three mammoth specimens. Note: SP1349 is the individual from which the complete *HBA-T2* and *HBB/D* coding sequences were determined (Supplementary Figs. 2–5). Clone sequences without primers (Delta\_Hem\_SNP3\_F and Delta\_Hem\_SNP3\_R) are given; dots indicate identical bases to those found in the woolly mammoth *HBB/D* gene (see Supplementary Fig. 3). The mammoth specific G C substitution at position 304 is indicated in red and was consistently obtained from all clones of SP1349, and was present in clones of both the less well-preserved mammoth specimens (SP1419 and SP1421). However, numerous clones of the latter two also possessed sequences consistent with the *Loxodonta HBBps*, *HBE*, and *HBG* loci, potentially indicating that other genes from the mammoth  $\beta$ -globin cluster had been co-amplified. However, further investigation revealed that dog and human contaminants detected in four separate ‘blank’ negative controls (Blk) were a perfect match for the sequence variants, strongly suggesting that they were in fact a result of contamination. It is important to note that since changes in the flanking region sequences around the genes in the  $\beta$ -globin cluster mean that the primers would strongly preferentially bind to any authentic *HBB/D* loci that were present, so that if any modern elephant contamination were present it would have been highly likely to result in elephant *HBB/D* sequences (*i.e.*, not *HBBps* or *HBE* or *HBG* paralogs) in the SP1349, SP1419 and SP1421 clones; this was not found.

|                        | 290                                   | 300   | 310               |                 |
|------------------------|---------------------------------------|-------|-------------------|-----------------|
|                        | . . . .   . . . .   . . . .   . . . . | ↓     | . . . .   . . . . | IVS2→           |
| Mammoth <i>HBB/D</i>   | CAAGCTGCACGTGGATCCT                   | C     | CAGAATTTTCAGG     | gtgagtctaggaga- |
| <i>Elephas HBB/D</i>   | .....                                 | G     | .....             | .....c          |
| <i>Loxodonta HBB/D</i> | .....                                 | G     | .....             | .....c          |
| <i>Loxodonta HBDps</i> | .....TG                               | A     | .....C            | .....t          |
| <i>Loxodonta HBBps</i> | .....A                                | T     | .....G            | .....C          |
| <i>Loxodonta HBE</i>   | .....                                 | G     | .....C            | .....C          |
| <i>Loxodonta HBG</i>   | .....                                 | G     | .....C            | .....c          |
| Human HBD              | .....                                 | G     | .....C            | .....c          |
| Human HBB              | .....                                 | G     | .....C            | .....t          |
| Dog HBD                | .....CG                               | ..... | C                 | .....A          |
| Dog HBB                | .....CG                               | ..... | C                 | .....A          |
| Delta_Hem_SNP3_F       | .....                                 | ~     | .....             | .....           |
| Delta_Hem_SNP3_R       | .....                                 | ~     | .....             | .....c          |
| SP1349 1 c11           | .....                                 | .     | .....             | .....           |
| SP1349 1 c12           | .....                                 | .     | .....             | .....           |
| SP1349 1 c13           | .....                                 | .     | .....             | .....           |
| SP1349 1 c14           | .....                                 | .     | .....             | .....           |
| SP1349 1 c15           | .....                                 | .     | .....             | .....           |
| SP1349 2 c11           | .....                                 | .     | .....             | .....           |
| SP1349 2 c12           | .....                                 | .     | .....             | .....           |
| SP1349 2 c13           | .....                                 | .     | .....             | .....           |
| SP1349 2 c14           | .....                                 | .     | .....             | .....           |
| SP1349 2 c15           | .....                                 | .     | .....             | .....           |
| SP1349 2 c16           | .....                                 | .     | .....             | .....           |
| SP1349 3 c11           | .....                                 | .     | .....             | .....           |
| SP1349 3 c12           | .....                                 | .     | .....             | .....           |
| SP1349 3 c3            | .....                                 | .     | .....             | .....           |
| SP1349 3 c4            | .....                                 | .     | .....             | .....           |
| SP1349 3 c5            | .....                                 | .     | .....             | .....           |
| SP1419 1 c11           | .....                                 | .     | .....             | .....           |
| SP1419 1 c13           | .....                                 | .     | .....             | .....           |
| SP1419 1 c14           | .....                                 | .     | .....             | .....           |
| SP1419 1 c15           | .....                                 | .     | .....             | .....           |
| SP1419 1 c18           | .....                                 | .     | .....             | .....           |
| SP1419 2 c12           | .....                                 | .     | .....             | .....           |
| SP1419 2 c17           | .....                                 | .     | .....             | .....           |

```

SP1419 3 c11      ~~~~~C~~~~~
SP1419 3 c12      ~~~~~C~~~~~
SP1419 3 c14      ~~~~~C~~~~~
SP1419 1 c12      ~~~~~G...C~~~~~
SP1419 1 c16      ~~~~~G...C~~~~~
SP1419 1 c17      ~~~~~G...C~~~~~
SP1419 1 c19      ~~~~~G...C~~~~~
SP1419 1 c110     ~~~~~G...C~~~~~
SP1419 1 c111     ~~~~~G...C~~~~~
SP1419 1 c112     ~~~~~G...C~~~~~
SP1419 2 c11      ~~~~~CG...C~~~~~
SP1419 2 c13      ~~~~~G...C~~~~~
SP1419 2 c14      ~~~~~G...C~~~~~
SP1419 2 c15      ~~~~~G...C~~~~~
SP1419 2 c16      ~~~~~G...C~~~~~
SP1419 2 c18      ~~~~~G...C~~~~~
SP1419 2 c19      ~~~~~G...C~~~~~
SP1419 2 c110     ~~~~~G...C~~~~~
SP1419 2 c111     ~~~~~G...C~~~~~
SP1419 2 c112     ~~~~~G...C~~~~~
SP1419 2 c113     ~~~~~G...C~~~~~
SP1419 2 c114     ~~~~~G...C~~~~~
SP1419 2 c115     ~~~~~G...C~~~~~
SP1419 3 c13      ~~~~~G...C~~~~~
SP1419 3 c15      ~~~~~G...C~~~~~
SP1419 3 c16      ~~~~~G...C~~~~~
SP1419 3 c17      ~~~~~G...C~~~~~

SP1421 1 c11      ~~~~~C~~~~~
SP1421 1 c13      ~~~~~C~~~~~
SP1421 1 c14      ~~~~~C~~~~~
SP1421 3 c11      ~~~~~C~~~~~
SP1421 3 c12      ~~~~~G...C~~~~~
SP1421 3 c13      ~~~~~C~~~~~
SP1421 3 c14      ~~~~~C~~~~~
SP1421 3 c15      ~~~~~C~~~~~
SP1421 3 c16      ~~~~~C~~~~~
SP1421 1 c12      ~~~~~G...C~~~~~
SP1421 2 c11      ~~~~~G...C~~~~~
SP1421 2 c12      ~~~~~G...C~~~~~
SP1421 2 c13      ~~~~~G...C~~~~~
SP1421 2 c14      ~~~~~G...C~~~~~
SP1421 2 c15      ~~~~~G...C~~~~~
SP1421 2 c16      ~~~~~G...C~~~~~
SP1421 2 c17      ~~~~~G...C~~~~~

Blk 1 c11      ~~~~~CG...C~~~~~
Blk 1 c12      ~~~~~CG...C~~~~~
Blk 1 c13      ~~~~~CG...C~~~~~
Blk 1 c14      ~~~~~CG...C~~~~~
Blk 2 c11      ~~~~~G...C~~~~~
Blk 2 c12      ~~~~~G...C~~~~~
Blk 2 c13      ~~~~~G...C~~~~~
Blk 2 c14      ~~~~~G...C~~~~~
Blk 2 c15      ~~~~~G...C~~~~~
Blk 3 c11      ~~~~~G...C~~~~~
Blk 3 c12      ~~~~~G...C~~~~~
Blk 3 c13      ~~~~~G...C~~~~~
Blk 3 c14      ~~~~~G...C~~~~~
Blk 3 c15      ~~~~~G...C~~~~~
Blk 3 c16      ~~~~~G...C~~~~~
Blk 3 c17      ~~~~~G...C~~~~~
Blk 4 c11      ~~~~~CG...C~~~~~
Blk 4 c12      ~~~~~CG...C~~~~~

```

|           |                  |
|-----------|------------------|
| Blk 4 c13 | ~~~~~CG...C~~~~~ |
| Blk 4 c14 | ~~~~~CG...C~~~~~ |
| Blk 4 c15 | ~~~~~CG...C~~~~~ |
| Blk 4 c16 | ~~~~~CG...C~~~~~ |





*Homo sapiens* .H..PE..KA.TA.....D.V....G.....Q...S.....P...MG.P..K...K...GA.SD..A.....AT.....E.....C...H.....P....Q.....  
*Macaca mulatta* .H..PE..SN.TT.....D.V....G...L...Q...S.....SP...MG.P..K...K...GA.SD..N.....AQ.....E..K.....C...H.....Q...Q.....  
*Ateles geoffroyi* .H..GE..AA.TA.....D.V....G.....Q...S.....P...MS.P..K...K...GA.SD..A.....AQ.....E.....C...H.....QL...Q.....  
*Eulemur fulvus* TL.S.E.NAH.TS....D.EKV....G.....Q...S.....SPSA.MG.P..K...K...SA.S...H.....VAQ.....E.....V...E...NA.S.AV...Q.....  
*Lemur variegates* TF..PE.NGH.TS....E.KV....G.....Q...S.....SP..IMG.P..K...K...SA.S...H.....AQ.....VA...E..K.....H...ND.S.QT...FQ...T.....  
*Tarsius bancanus* .H...D..AA.TA....D.EDV....G.....Q...DS.....PA..MG.A..K...K...NA.S..MA.....AK.....E.....C...H.....Q...Q.....T.....  
*Tupaia glis* .H.SGE..AA.TG....DLEKV..QSLGS..I....Q...DS.....SPS..MS.P..K...K...SD..N.....AK.....E.....R...CN..PE...Q...FQ.....

**Marsupialia**  
*Didelphis marsupialis* .H..SE..NCITTI.S..Q.DQT....G.M.....T...GS.....SPG..MS.S..Q...A.....AV.....YAK.....E..KM...II..C..E...D...EC...WQ.L...H.....  
*Macropus eugenii* .H...E..NAITS....AIEQT....G...I....S...D.....N.K..MS.P....A...VA..DAI.N.....AK.....D.....N.K..E..K...II..C..E...I.A.V.WQ.L.....  
*Macropus giganteus* .H...E..NAITS....VAIEQT....G...I....S...D.....N.K..MA.P....A...VA..DAI.N.....AK.....E..K...II..C..E...I.T.V.WQ.L.....

**Monotremata**  
*Tachyglossus aculeatus* .H.SGS...A.T...H...N.....G.....Q...S.....S...MG...K...A.....DA..N.....AK.....E..NR....V....S....EA...WQ.L.S..SH.....  
*Ornithorhynchus anatinus* .H.SGG..SA.T.....IN.....G.....Q...A....S.G..MG.P..K...A.....DA..N..D...AK.....E..NR....IV....S.D.S.E...WQ.L.S..H..G...

Supplementary Figure 10. Molecular model illustrating altered electrostatic interactions in mammoth hemoglobin (Hb) arising from the  $\beta/\delta$ -globin chain E101Q substitution. The carboxyl group of  $\beta/\delta$ 101Glu in R state Asian elephant Hb (**A**) interacts closely with the guanidino group of  $\beta/\delta$ 104Arg of the same chain. This interaction is weakened in mammoth oxyHb causing the R state to lose one hydrogen bond (**B**). However, in comparison to Asian elephant deoxyHb (**C**), the uncharged  $\beta/\delta$ 101Gln residue of mammoth deoxyHb interacts electrostatically with both the  $N_{\epsilon}$ -nitrogen of  $\beta/\delta$ 104Arg and the carboxyl group of  $\alpha$ 94Asp (**D**).

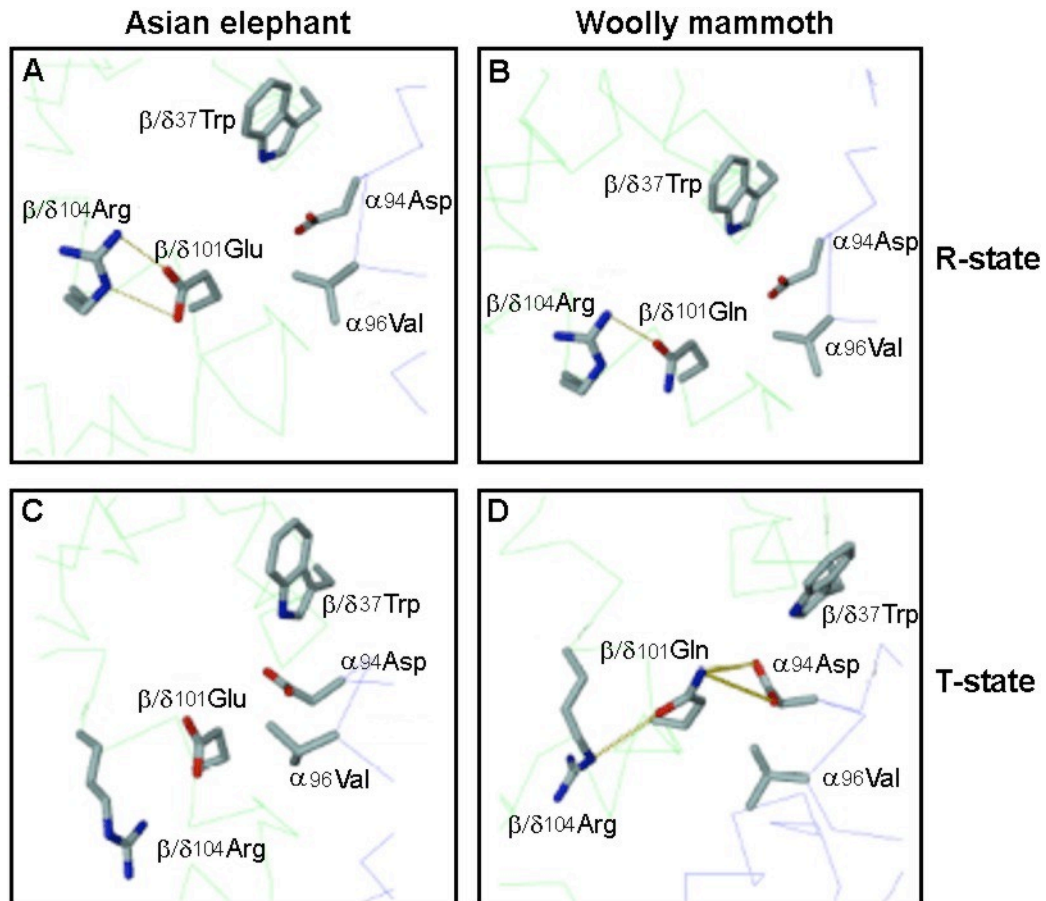

Supplementary Figure 11. Side view surface model of a chimeric Asian elephant (left) and woolly mammoth (right) deoxyhemoglobin molecule. The locations of the three mammoth-specific amino-acid substitutions are highlighted in blue, while regions highlighted in yellow denote residues ( $\beta/\delta 1$ Val,  $\beta/\delta 82$ Lys,  $\beta/\delta 143$ His) implicated in 2,3-bisphosphoglycerate (BPG) binding. The mammoth  $\beta/\delta 101$ Gln residue is spatially distant from this site and hence does not alter the phosphate sensitivity of the Hb moiety. The mammoth  $\alpha$ -globin chain is represented by a backbone diagram.

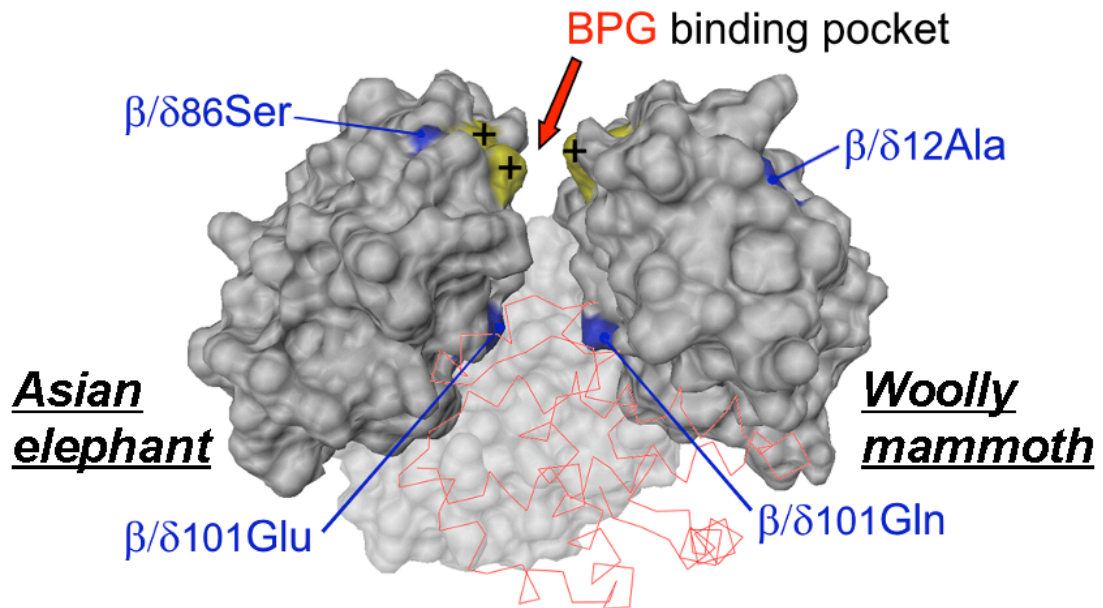

Supplementary Figure 12. The effect of the chloride ion concentration on the oxygen affinity (half-saturation pressure;  $P_{50}$ ) and cooperativity coefficients ( $n_{50}$ ) of woolly mammoth, Asian elephant, bovine and adult human hemoglobin at 25°C and in the absence of 2,3-bisphosphoglycerate. Data from human and bovine Hbs taken from refs 12 and 13, respectively. Mammoth, elephant and human Hb were measured at pH 7.4 while that of bovine Hb was measured at pH 7.2.

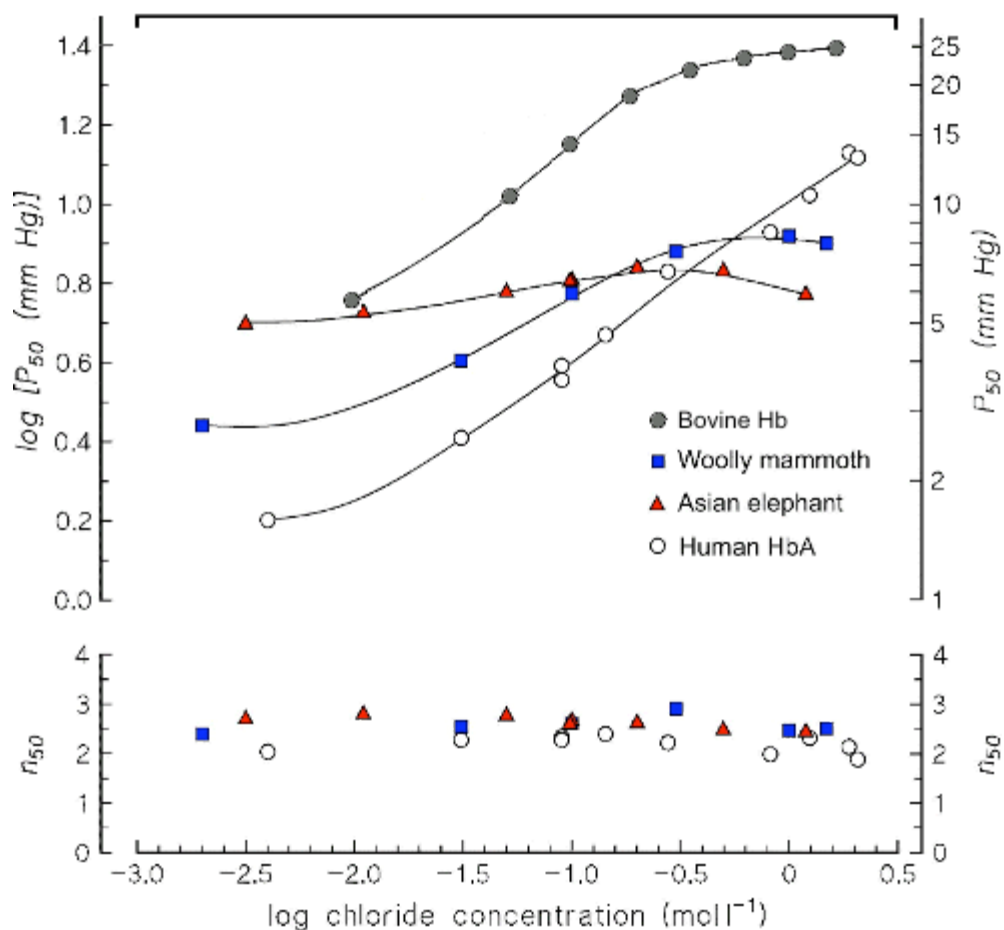

Supplementary Table 1. Primary/external primers used to amplify woolly mammoth *HBA-T2* and *HBB/D* globin genes from woolly mammoth specimen SP1349 (Adelaide).

| Frag ID        | Primer name         | 5' to 3' sequence             | Frag size including primers | Bp of sequence data |
|----------------|---------------------|-------------------------------|-----------------------------|---------------------|
| HBA-T2 F1      | SP1349_Alpha2_F1.1  | CGCTTCTGATCTCCACACAGACTC      | 155                         | 112                 |
|                | SP1349_Alpha2_R1.3  | GTAGGGGACAGGGGGATCC           |                             |                     |
| HBA-T2 F2      | SP1349_Alpha2_F2N   | TCCCTGTTCCCCTACCCTAC          | 100                         | 62                  |
|                | SP1349_Alpha2_R2.2N | GTGAGGAAAGTAGGTCTT            |                             |                     |
| HBA-T2 F3      | SP1349_Alpha2_F2.3  | CACGCAGGATGTTCTTCT            | 140                         | 104                 |
|                | SP1349_Alpha2_R2.3N | GTCATCCAGGTGGCCAAC            |                             |                     |
| HBA-T2 F4      | SP1349_Alpha2_F2.4  | GAAGGTGGGGGAAGCACTGA          | 140                         | 102                 |
|                | SP1349_Alpha2_R2.4N | CCAGGTCTTCCCCTCTCC            |                             |                     |
| HBA-T2 F5      | SP1349_Alpha2_F3N   | AGGTGAGCGTTCCTAACAG           | 117                         | 77                  |
|                | SP1349_Alpha2_R3.2  | CATGGACCTCAGGGGTGAAC          |                             |                     |
| HBA-T2 F6      | SP1349_Alpha2_F3.1N | CTCTCTCCACAGCTCCTG            | 153                         | 115                 |
|                | SP1349_Alpha2_R3N   | CTGGGGTCCAGCTTAACGAT          |                             |                     |
| HBA-T2 F7      | SP1349_Alpha2_F3.1N | CTCTCTCCACAGCTCCTG            | 189                         | ---                 |
|                | SP1349_Alpha2_R3    | GGAGGAAGGCCAGTGGCA            |                             |                     |
| HBB/D F1       | SP1349_Delta_F1     | CAGGACCAGGGTTGGGCA            | 209                         | ---                 |
|                | SP1349_Delta_R1     | GCAACCTAGATACAAACCTGCT        |                             |                     |
| HBB/D F2       | SP1349_Delta_F2     | GCTGAGAAGACACAAGTCACCAACC     | 184                         | ---                 |
|                | SP1349_Delta_R2     | CAGGGTGCAGAGGAAGTCAGTGC       |                             |                     |
| HBB/D F3       | SP1349_Delta_F3     | TGGGCATGTGGAGACAGAACA         | 214                         | ---                 |
|                | SP1349_Delta_R3     | AGCCCTCACCAAAGGAGGTC          |                             |                     |
| HBB/D F4       | SP1349_Delta_F4.1   | TGACGCTGTCCTGCACAACG          | 202                         | ---                 |
|                | SP1349_Delta_R4     | CTACAAAGTGAAGAAAGAAAAATAGAATG |                             |                     |
| HBB/D F5       | SP1349_Delta_F5     | TGTATGTATCTACCTCTTCCCCTAG     | 239                         | ---                 |
|                | SP1349_Delta_R5     | GAGAGTTGGCATTATTTCCCAA        |                             |                     |
| HBB/D promoter | SP1349_Del_Upstr_F  | TGGCTGTCATCATTGAGCC           | 145                         | 105                 |
|                | SP1349_Del_Upstr_R  | GTTGTGTCAGAAGTGAGTGT          |                             |                     |

Supplementary Table 2. Secondary/internal primers used to amplify the woolly mammoth *HBA-T2* and *HBB/D* globin genes from woolly mammoth specimen SP1349 (Adelaide).

| Frag ID   | Primer name         | 5' to 3' sequence            | Frag size including primers | Bp of sequence data |
|-----------|---------------------|------------------------------|-----------------------------|---------------------|
| HBA-T2 F3 | SP1349_Alpha2_F2.3N | GTTCTTCTCCTTTCCCACCACCAA     | 130                         | 88                  |
|           | SP1349_Alpha2_R2.3N | GTCATCCAGGTGGCCAAC           |                             |                     |
| HBA-T2 F4 | SP1349_Alpha2_F2.4N | GGGAAGCACTGACCCAA            | 132                         | 97                  |
|           | SP1349_Alpha2_R2.4N | CCAGGTCTTCCCCTCTCC           |                             |                     |
| HBA-T2 F5 | SP1349_Alpha2_F3N   | AGGTGAGCGTTCCTAACAG          | 112                         | 72                  |
|           | SP1349_Alpha2_R3.2N | ACCTCAGGGGTGAACTCCGT         |                             |                     |
| HBA-T2 F6 | SP1349_Alpha2_F3.2  | GTGACTCTAAGCAGCCACC          | 120                         | 81                  |
|           | SP1349_Alpha2_R3N   | CTGGGGTCCAGCTTAACGAT         |                             |                     |
| HBA-T2 F7 | SP1349_Alpha2_F3.2  | GTGACTCTAAGCAGCCACC          | 146                         | 107                 |
|           | SP1349_Alpha2_R3    | GGAGGAAGGCCAGTGGCA           |                             |                     |
| HBB/D F1  | SP1349_Delta_F1N    | GGGCATATAAGGAAGAGTAGTGC      | 169                         | 126                 |
|           | SP1349_Delta_R1N    | CCTCACCACCAAGCTCTTTC         |                             |                     |
| HBB/D F2  | SP1349_Delta_F2N    | CACAAGTCACCAACCTGTGG         | 153                         | 113                 |
|           | SP1349_Delta_R2N    | GCCTGTCAGAACTGGGAGA          |                             |                     |
| HBB/D F2I | SP1349_Delta_F2.2   | GACTTAAGGAGGGTTGAGTG         | 87                          | 44                  |
|           | SP1349_Delta_R2     | CAGGGTGCAGAGGAAGTCAGTGC      |                             |                     |
| HBB/D F3  | SP1349_Delta_F3N    | CAGAACAGTCTCCCAGTTTCTG       | 191                         | 177                 |
|           | SP1349_Delta_R3N    | AAAGGAGGTCAACACTTTCTCG       |                             |                     |
| HBB/D F4  | SP1349_Delta_F4.1N  | GCTGTCCTGCACAACGCTAAA        | 198                         | 149                 |
|           | SP1349_Delta_R4     | CTACAAAGTGAAAAGAAAAAATAGAATG |                             |                     |
| HBB/D F5  | SP1349_Delta_F5     | TGTATGTATCTACCTCTTCCCCATAG   | 213                         | 166                 |
|           | SP1349_Delta_R5N    | CAGAGATAGCATCTCGGGAAA        |                             |                     |

Supplementary Table 3. Primers used to replicate mammoth specific non-synonymous substitutions of the *HBB/D* globin gene (Leipzig).

| Frag ID                | Primer name          | 5' to 3' sequence      | Frag size including primers | Bp of sequence data |
|------------------------|----------------------|------------------------|-----------------------------|---------------------|
| $\beta/\delta$ 12 SNP  | Delta_Hem_SNP1_F     | CTGACTGCTGCTGAGAAGACAC | 51                          | 11                  |
|                        | Delta_Hem_SNP1_R     | ATTCACCTTGCCCCACAG     |                             |                     |
| $\beta/\delta$ 86 SNP  | Delta_Hem_SNP2_F     | AGCACCTGGACAACCTCAAG   | 48                          | 11                  |
|                        | Delta_Hem_SNP2_R     | GCAGCTCGCTCAGATCG      | 54                          | 16                  |
|                        | Delta_Hem_SNP2_R_new | CACAGTGCAGCTCGCTCA     |                             |                     |
| $\beta/\delta$ 101 SNP | Delta_Hem_SNP3_F     | CAAGCTGCACGTGGATCC     | 46                          | 7                   |
|                        | Delta_Hem_SNP3_R     | GTCTCCTAGACTCACCCCTGAA |                             |                     |

Supplementary Table 4. Primer pairs used to convert the Asian elephant pHE27E plasmid into the mammoth pHE27M plasmid via site-directed mutagenesis. The mutated codons are underlined.

| Amino-acid change              | 5' to 3' sequence                                           |
|--------------------------------|-------------------------------------------------------------|
| K5N of $\alpha$ -chain         | GGAGGAATAACATATGGTCTTAAGTGATA <u>AAC</u> GACAAGACCAACGTCAAG |
|                                | CTTGACGTTGGTCTTGTGCGTTATCACTTAAGACCATATGTTATTCTCC           |
| T12A of $\beta/\delta$ -chain  | GCTGAGAAGACACAAGTG <u>GCC</u> AACCTGTGGGGCAAGG              |
|                                | CCTTGCCCCACAGGTTGGCCACTTGTGTCTTCTCAGC                       |
| A86S of $\beta/\delta$ -chain  | CTGGACAACCTCAAGGGTACCTTTT <u>TCC</u> GATCTGAGCGAGCTG        |
|                                | CAGCTCGCTCAGATCGGAAAAGGTACCCTTGAGGTTGTCCAG                  |
| E101Q of $\beta/\delta$ -chain | GACAAGCTGCACGTGGACCCT <u>CAG</u> AATTCAGGCTCCTG             |
|                                | CAGGAGCCTGAAATTCTGAGGGTCCACGTGCAGCTTGT                      |

## Supplementary Information References

1. Hardies, S. C., Edgell, M. H. & Hutchison III, C. A. Evolution of the mammalian beta-globin gene cluster. *J. Biol. Chem.* **259**, 3748-3756 (1984).
2. Hoffmann, F. G., Opazo, J. C. & Storz, J. F. Rapid rates of lineage-specific gene duplication and deletion in the alpha-globin gene family. *Mol. Biol. Evol.* **25**, 591-602 (2008).
3. Aguilera, G., Bielawski, J. P. & Yang, Z. Proposed standard nomenclature for the  $\alpha$ - and  $\beta$ -globin gene families. *Genes Genet. Syst.* **81**, 367-371 (2006).
4. Garrick, M. D. & Garrick, L. M. in *Red Blood Cells of Domestic Mammals* (eds Agar N. S. & Board, P. G.) 165-207 (Elsevier, Amsterdam, 1983).
5. Myers, R. M., Tilly, K. & Maniatis, T. Fine structure genetic analysis of a beta-globin promoter. *Science* **232**, 613-618 (1986).
6. Opazo, J. C., Sloan, A. M., Campbell, K. L. & Storz, J. F. Origin and ascendency of a chimeric fusion gene: the beta/delta-globin gene of paenungulate mammals. *Mol. Biol. Evol.* **26**, 1469-1478 (2009).
7. Brotherton, P. *et al.* Novel high-resolution characterization of ancient DNA reveals C>U-type base modification events as the sole cause of *post mortem* miscoding lesions. *Nucleic Acids Res.* **35**, 5717-5728 (2007).
8. Miller, W. *et al.* Sequencing the nuclear genome of the extinct woolly mammoth. *Nature* **456**, 387-390 (2008).
9. Clementi, M. A., Condò, S. G., Castagnola, M. & Giardina, B. Hemoglobin function under extreme life conditions. *Eur. J. Biochem.* **223**, 309-317 (1994).
10. De Rosa M. C., Castagnola, M., Bertonati, C., Galtier, A. & Giardina, B. From the Arctic to fetal life: physiological importance and structural basis of an 'additional' chloride-binding site in haemoglobin. *Biochem. J.* **380**, 889-896 (2004).
11. Fronticelli, C. *et al.* Allosteric modulation by tertiary structure in mammalian hemoglobins. Introduction of the functional characteristics of bovine hemoglobin into human hemoglobin by five amino acid substitutions. *J. Biol. Chem.* **270**, 30588-30592 (1995).
12. Weber, R.E. Use of ionic and zwitterionic (Tris/BisTris and HEPES) buffers in studies on hemoglobin function. *J. Appl. Physiol.* **72**, 1611-1615 (1992).
13. Perutz, M. F., Fermi, G., Poyart, C., Pagnier, J. & Kister, J. A novel allosteric mechanism in haemoglobin: structure of bovine deoxyhaemoglobin, absence of specific chloride-binding sites and origin of the chloride-linked Bohr effect in bovine and human haemoglobin. *J. Mol. Biol.* **233**, 536-545 (1993).
